# Supplementary material for: G4 Landscape Dynamics Underlies Neuroprotective Responses in Neonatal Hypoxic-Ischemic Brain Injury
Source: Research Square preprint supplement (doi:10.21203/rs.3.rs-6683237/v1), 2025-06-19
Supplement: Supplementary file 1 [file 02cbeb7511ba67f73a91731b.xlsx]

## Sheet: Enhancer_HI_vs_sham (2)
gene_id	gene_symbol	G4_contra_score	G4_ipsi_score	G4_sham_score	h3k27ac_sham_score	h3k27ac_contra_score	h3k27ac_ipsi_score	h3k4me3_sham_score	h3k4me3_contra_score	h3k4me3_ipsi_score	log2FoldChange	pvalue	padj	RNA_sham_1	RNA_sham_2	RNA_ipsi_1	RNA_ipsi_2	regulated
ENSMUSG00000058355	Abce1	0	35	111	1748	1205	452	1542	1245	733				4114	3780	4291	4975
ENSMUSG00000079036	Alkbh1	0	31	0	1887	1328	589	731	540	674				593	594	910	980
ENSMUSG00000037316	Bag4	0	37	114	2256	1443	519	1116	1307	720				1208	1141	1095	1241
ENSMUSG00000039652	Cpeb3	180	78	90	1613	555	433	1357	1490	1007				2522	2117	2243	2556
ENSMUSG00000029625	Cpsf4	0	0	164	1432	1074	468	1362	1129	623				675	675	639	803
ENSMUSG00000034820	Cpsf7	74	97	172	2761	1608	571	1599	1391	827				2328	2192	2705	3107
ENSMUSG00000027498	Cstf1	0	0	72	1635	786	381	822	626	656				538	526	612	665
ENSMUSG00000004096	Cwc15	0	0	54	1581	916	772	1357	1161	906				1085	1043	1229	1529
ENSMUSG00000022300	Dcaf13	92	77	232	2091	1007	502	2525	2050	1387				1158	1049	1241	1427
ENSMUSG00000021962	Dcp1a	0	0	92	2062	1900	1171	1318	1330	625				775	769	747	853
ENSMUSG00000037993	Dhx38	0	0	196	941	431	215	906	1082	976				882	808	1108	1112
ENSMUSG00000033166	Dis3	31	55	109	999	553	315	1047	1658	779				1267	1161	1533	1767
ENSMUSG00000022191	Drosha	0	0	93	1049	553	315	1047	1658	779				4390	4114	4863	5665
ENSMUSG00000030871	Ears2	119	0	472	788	276	105	1147	1238	554				215	200	245	266
ENSMUSG00000021810	Ecd	0	0	76	896	668	282	749	1070	689				1006	875	1090	1329
ENSMUSG00000055762	Eef1d	39	0	260	2996	1967	940	1890	2333	1081				1363	1351	1649	1686
ENSMUSG00000020929	Eftud2	0	0	65	1613	890	383	940	678	383				2182	2170	2343	2757
ENSMUSG00000053565	Eif3k	0	0	48	1239	1196	618	1385	1370	1302				1181	1268	1588	1701
ENSMUSG00000022884	Eif4a2	0	0	110	1223	938	508	880	1212	643				10309	9753	11166	12958
ENSMUSG00000024271	Elp2	61	0	111	885	448	235	623	863	575				2503	2456	2318	2688
ENSMUSG00000025785	Exosc7	22	52	99	1554	756	460	1362	1243	745				543	527	463	578
ENSMUSG00000021532	Fastkd3	75	0	92	701	387	235	1147	799	579				269	246	219	268
ENSMUSG00000021666	Gfm2	0	0	0	1709	1006	626	1292	1625	1081				1114	1086	1086	1206
	Gm10767	0	0	0	2060	1108	705	1157	1446	989
	Hars	0	0	124	1614	909	643	1137	1192	938
ENSMUSG00000019143	Hars2	0	0	124	1741	867	741	1463	1382	1229				626	599	681	884
ENSMUSG00000022556	Hsf1	111	0	299	717	409	198	1048	1018	777				837	821	1178	1201
ENSMUSG00000109865	Hspa14	0	0	292	1185	628	243	1592	1873	965	1.78358	2.1699e-49	4.94174e-47	575	548	1395	1606	Upregulated
ENSMUSG00000024474	Ik	0	0	71	1315	795	620	714	668	482				2298	2064	2353	2894
	Kars	0	0	52	887	431	118	1251	1210	864
ENSMUSG00000037262	Kin	0	0	181	1053	582	296	1459	1470	1254				285	274	291	357
ENSMUSG00000074890	Lcmt2	0	0	50	1417	957	478	1482	1324	1085				211	171	355	370
ENSMUSG00000021891	Mettl6	0	0	0	665	241	258	953	927	532				578	547	785	911
ENSMUSG00000001445	Mrpl10	0	0	0	802	297	166	953	927	532				511	536	557	620
ENSMUSG00000022370	Mrpl13	0	0	0	1455	877	340	1100	1366	1242				927	882	916	1204
ENSMUSG00000023939	Mrpl14	121	47	244	1359	682	235	1373	1284	905				167	141	143	149
ENSMUSG00000015672	Mrpl32	23	0	127	172	303	108	1529	1169	960				660	633	592	811
ENSMUSG00000106918	Mrpl33	0	0	0	971	688	398	1793	1163	1060				562	541	550	658
ENSMUSG00000037531	Mrpl47	0	0	154	1333	804	434	1832	1599	1171				333	300	361	494
ENSMUSG00000007338	Mrpl49	95	0	188	1205	667	489	1138	1517	872				563	409	505	618
ENSMUSG00000027374	Mrps5	0	0	103	573	698	347	1274	1084	727				901	808	842	974
ENSMUSG00000026887	Mrrf	0	0	99	1320	449	627	1160	1446	1038				386	419	457	490
ENSMUSG00000028741	Mrto4	0	60	84	1217	525	410	927	583	653				312	358	416	483
ENSMUSG00000041939	Mvk	0	0	212	1253	639	315	1002	1147	570				515	434	600	747
ENSMUSG00000041881	Ndufa7	0	0	116	706	284	172	1646	1168	1108				1316	1218	1480	1680
ENSMUSG00000060739	Nsa2	0	0	0	1742	906	750	1442	1483	1171				848	900	944	1027
ENSMUSG00000031754	Nudt21	0	0	0	1016	651	398	1678	1519	779				2971	2720	2904	3538
ENSMUSG00000033009	Ogfod1	0	0	71	1648	827	344	1147	988	613				1153	1166	1305	1503
ENSMUSG00000006289	Osgep	55	0	0	809	472	230	1362	1376	1077				424	427	557	626
ENSMUSG00000025047	Pdcd11	47	0	189	1897	871	441	739	676	356				950	868	1074	1196
ENSMUSG00000078931	Pdf	0	0	103	1087	443	409	1476	1972	1581				32	19	21	33
ENSMUSG00000042275	Pelo	0	0	108	587	127	427	695	922	501				92	60	130	108
ENSMUSG00000061360	Phf5a	0	0	0	4036	2993	1655	1764	1238	914				578	598	760	870
ENSMUSG00000041815	Poldip3	0	40	113	897	516	231	1217	1082	698				2047	1881	2417	2695
ENSMUSG00000040435	Ppp1r15a	0	0	0	1108	567	293	1274	1388	536	2.03878	3.17179e-11	8.76727e-10	617	453	2686	2580	Upregulated
ENSMUSG00000008373	Prpf31	0	0	0	1134	626	293	1274	1388	536				746	749	735	875
ENSMUSG00000029624	Ptcd1	0	0	164	865	521	406	1012	1507	710				383	355	430	460
ENSMUSG00000021650	Ptcd2	0	0	150	1598	806	329	1093	841	679				571	654	653	647
ENSMUSG00000063884	Ptcd3	0	0	14	724	415	215	1205	1078	421				1489	1281	1551	1810
ENSMUSG00000031167	Rbm3	0	0	0	688	373	91	1675	1238	905				3430	3062	3734	4360
ENSMUSG00000042396	Rbm7	0	0	0	1314	1057	333	1769	1552	775				801	723	909	1154
ENSMUSG00000009535	Rnmt	0	0	289	600	435	210	1025	1068	1030				2119	1980	1991	2290
ENSMUSG00000074129	Rpl13a	0	0	191	965	416	280	1693	1432	1145				306	343	433	512
ENSMUSG00000012405	Rpl15	71	0	229	2523	1449	1036	1286	1392	845				4753	4424	5028	6111
ENSMUSG00000045128	Rpl18a	0	0	0	795	697	375	1601	1125	775				3228	2755	3989	4545
ENSMUSG00000060938	Rpl26	0	0	0	882	283	209	1305	1247	961				2338	2180	3101	3632
ENSMUSG00000003429	Rps11	0	0	160	947	525	204	1214	1079	710				2523	2321	2919	3587
ENSMUSG00000020460	Rps27a	0	0	0	476	289	224	1113	1219	916				1876	1818	2106	2673
ENSMUSG00000020516	Rps6kb1	16	87	204	1932	1668	781	650	2019	1156				2255	2267	1969	2252
ENSMUSG00000032518	Rpsa	0	0	68	2032	1503	631	1998	1809	904				6144	5723	7679	7714
ENSMUSG00000030888	Rrp8	113	45	236	1172	525	255	1647	1190	995				437	456	593	573
ENSMUSG00000078427	Sarnp	0	0	98	3653	3132	1726	1867	1603	1100				392	391	411	566
ENSMUSG00000038290	Smg6	36	0	137	1064	656	236	849	900	446				1616	1579	1667	1896
ENSMUSG00000055436	Srsf11	0	47	14	1758	1333	732	1645	1801	2064				4264	4040	4607	5371
ENSMUSG00000011306	Sugp1	43	0	50	1108	666	315	1274	1203	1022				1279	1248	1454	1653
ENSMUSG00000028233	Tgs1	0	0	0	1075	710	362	1070	1146	848				1395	1173	1416	1776
ENSMUSG00000034442	Trmt5	0	0	44	842	505	296	1274	1146	709				302	316	371	355
ENSMUSG00000035585	Tsen34	0	0	76	842	505	296	1274	1146	709				1072	1009	1150	1343
ENSMUSG00000056310	Tyw1	0	0	86	1359	667	289	1755	1552	797				548	494	464	619
ENSMUSG00000030216	Wbp11	0	0	151	2198	1548	965	1104	1307	1037				1940	1910	2231	2537
ENSMUSG00000019470	Xab2	0	0	76	2197	1403	593	1332	1599	819				815	802	1059	1074
ENSMUSG00000022635	Zcrb1	0	0	27	1271	545	468	1124	1230	1060				882	924	828	941
ENSMUSG00000009076	Zmat5	0	0		2684	1423	1094	2333	2776	2568				152	98	152	143
