# Supplementary material for: G4 Landscape Dynamics Underlies Neuroprotective Responses in Neonatal Hypoxic-Ischemic Brain Injury
Source: Research Square preprint supplement (doi:10.21203/rs.3.rs-6683237/v1), 2025-06-19
Supplement: Supplementary file 1 [file 4e63fb23158b43b6e397f0a4.pdf]

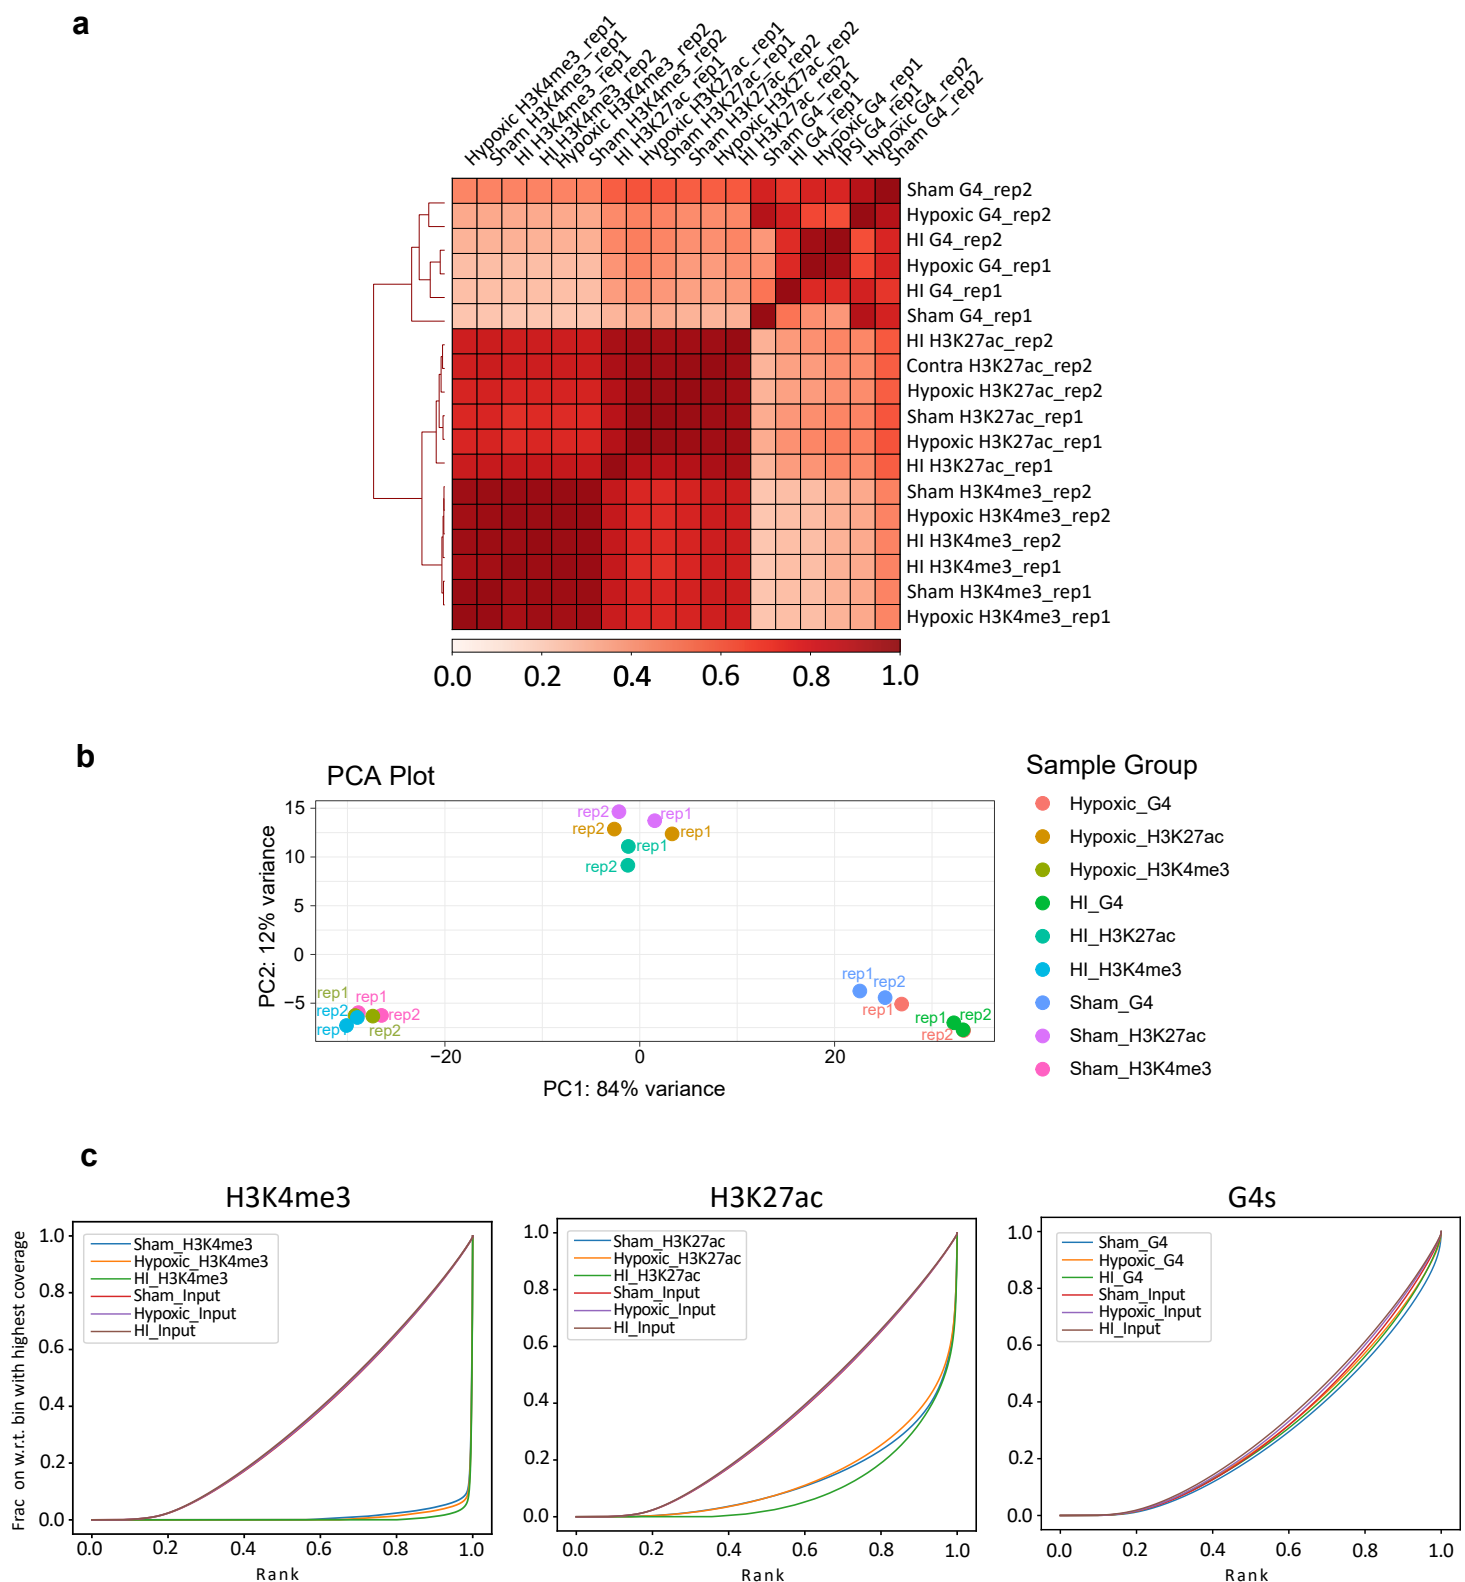

**Supplementary Figure 1. a.** Correlation heatmaps with Pearson correlation scores are shown for all biological replicates of ChIP-seq samples. For each chromatin mark and condition, two different biological replicates are listed, named “rep1” and “rep2”. **b.** PCA plot is shown for H3K4me3, H3K27ac, and G4s for the variability among the biological replicates for three different conditions analyzed by ChIP-seq. **c.** Fingerprint plots showing the enrichment over the input signal in the three sample groups analyzed by ChIP-seq.



a

## G4 – known motifs

|         | Rank | Motif | Name                                                  | P-value | log P-value | q-value (Benjamini) | # Target Sequences with Motif | % of Targets Sequences with Motif | # Background Sequences with Motif | % of Background Sequences with Motif |
|---------|------|-------|-------------------------------------------------------|---------|-------------|---------------------|-------------------------------|-----------------------------------|-----------------------------------|--------------------------------------|
| Sham    | 1    |       | Sp1(Zf)/Promoter/Homer                                | 1e-10   | -2.498e+01  | 0.0000              | 241.0                         | 2.09%                             | 509.3                             | 1.32%                                |
|         | 2    |       | NRF(NRF)/Promoter/Homer                               | 1e-5    | -1.375e+01  | 0.0002              | 196.0                         | 1.70%                             | 458.2                             | 1.19%                                |
|         | 3    |       | ZNF143(STAF(Zf)/CUTLL-ZNF143-ChIP-Seq(GSE29600)/Homer | 1e-4    | -1.107e+01  | 0.0022              | 524.0                         | 4.55%                             | 1457.7                            | 3.79%                                |
| Hypoxic | 1    |       | FOXA1(Forkhead)/MCF7-FOXA1-ChIP-Seq(GSE26831)/Homer   | 1e-4    | -9.904e+00  | 0.0214              | 982.0                         | 13.48%                            | 5110.4                            | 11.97%                               |
|         | 2    |       | c-Myc(bHLH)/mES-cMyc-ChIP-Seq(GSE11431)/Homer         | 1e-3    | -8.355e+00  | 0.0503              | 423.0                         | 5.81%                             | 2089.7                            | 4.89%                                |
|         | 3    |       | GFY-Staf(?Zf)/Promoter/Homer                          | 1e-3    | -8.157e+00  | 0.0503              | 61.0                          | 0.84%                             | 221.3                             | 0.52%                                |
| HI      | 1    |       | Six1(Homeobox)/Myoblast-Six1-ChIP-Seq(GSE20150)/Homer | 1e-3    | -7.339e+00  | 0.2780              | 193.0                         | 2.59%                             | 867.5                             | 2.04%                                |
|         | 2    |       | THRB(NR)/Liver-NR1A2-ChIP-Seq(GSE52613)/Homer         | 1e-2    | -6.355e+00  | 0.3720              | 3356.0                        | 45.07%                            | 18447.8                           | 43.38%                               |
|         | 3    |       | HIF-1b(HLH)/T47D-HIF1b-ChIP-Seq(GSE59937)/Homer       | 1e-2    | -6.351e+00  | 0.3720              | 744.0                         | 9.99%                             | 3828.6                            | 9.00%                                |

b

## G4 – de novo motifs

|         | Rank | Motif | P-value | log P-value | % of Targets | % of Background | STD(Bg STD)     | Best Match/Details                                                                                                                              |
|---------|------|-------|---------|-------------|--------------|-----------------|-----------------|-------------------------------------------------------------------------------------------------------------------------------------------------|
| Sham    | 1    |       | 1e-20   | -4.629e+01  | 0.13%        | 0.00%           | 57.7bp (0.0bp)  | GLI3(Zf)/Limb-GLI3-ChIP-Seq(GSE11077)/Homer(0.745)<br><a href="#">More Information</a>   <a href="#">Similar Motifs Found</a>                   |
|         | 2    |       | 1e-19   | -4.415e+01  | 0.38%        | 0.07%           | 58.9bp (62.4bp) | Smad4/MA1153.1/Jaspar(0.658)<br><a href="#">More Information</a>   <a href="#">Similar Motifs Found</a>                                         |
|         | 3    |       | 1e-16   | -3.796e+01  | 9.20%        | 7.11%           | 53.8bp (57.5bp) | PB0200.1_Zfp187_2/Jaspar(0.609)<br><a href="#">More Information</a>   <a href="#">Similar Motifs Found</a>                                      |
| Hypoxic | 1    |       | 1e-19   | -4.472e+01  | 13.60%       | 10.22%          | 56.6bp (56.0bp) | Nkx2-5(var.2)/MA0503.1/Jaspar(0.688)<br><a href="#">More Information</a>   <a href="#">Similar Motifs Found</a>                                 |
|         | 2    |       | 1e-17   | -3.989e+01  | 0.26%        | 0.02%           | 49.5bp (42.8bp) | Tcf21(bHLH)/ArterySmoothMuscle-Tcf21-ChIP-Seq(GSE61369)/Homer(0.635)<br><a href="#">More Information</a>   <a href="#">Similar Motifs Found</a> |
|         | 3    |       | 1e-17   | -3.962e+01  | 3.60%        | 2.03%           | 54.1bp (52.8bp) | RARa(NR)/K562-RARa-ChIP-Seq(Encode)/Homer(0.739)<br><a href="#">More Information</a>   <a href="#">Similar Motifs Found</a>                     |
| HI      | 1    |       | 1e-16   | -3.785e+01  | 9.47%        | 6.89%           | 55.5bp (55.7bp) | PB0159.1_Rfx4_2/Jaspar(0.622)<br><a href="#">More Information</a>   <a href="#">Similar Motifs Found</a>                                        |
|         | 2    |       | 1e-13   | -3.142e+01  | 0.17%        | 0.01%           | 46.3bp (53.4bp) | SD0002.1_at_AC_acceptor/Jaspar(0.725)<br><a href="#">More Information</a>   <a href="#">Similar Motifs Found</a>                                |
|         | 3*   |       | 1e-11   | -2.572e+01  | 0.68%        | 0.22%           | 56.8bp (54.1bp) | MF0002.1_bZIP_CREB/G-box-like_subclass/Jaspar(0.689)<br><a href="#">More Information</a>   <a href="#">Similar Motifs Found</a>                 |

**Supplementary Figure 3.** Motif analysis results show the top three enriched known and de novo motifs for G4s.

a

## H3K4me3 – known motifs

|         | Rank | Motif | Name                                                        | P-value | log P-value | q-value (Benjamini) | # Target Sequences with Motif | % of Targets Sequences with Motif | # Background Sequences with Motif | % of Background Sequences with Motif |
|---------|------|-------|-------------------------------------------------------------|---------|-------------|---------------------|-------------------------------|-----------------------------------|-----------------------------------|--------------------------------------|
| Sham    | 1    |       | BORIS(Zf)/K562-CTCF-ChIP-Seq(GSE32465)/Homer                | 1e-4    | -1.126e+01  | 0.0055              | 392.0                         | 1.93%                             | 460.9                             | 1.55%                                |
|         | 2    |       | ERE(NR)/IR3/MCF7-ERa-ChIP-Seq(Unpublished)/Homer            | 1e-4    | -1.036e+01  | 0.0068              | 546.0                         | 2.69%                             | 670.9                             | 2.26%                                |
|         | 3    |       | MeF2c(MADS)/GM12878-MeF2c-ChIP-Seq(GSE32465)/Homer          | 1e-4    | -9.379e+00  | 0.0121              | 1017.0                        | 5.01%                             | 1321.4                            | 4.45%                                |
| Hypoxic | 1    |       | ZNF16(Zf)/HEK293-ZNF16.GFP-ChIP-Seq(GSE58341)/Homer         | 1e-5    | -1.240e+01  | 0.0018              | 19.0                          | 0.09%                             | 8.6                               | 0.03%                                |
|         | 2    |       | Pax8(Paired.Homeobox)/Thyroid-Pax8-ChIP-Seq(GSE26938)/Homer | 1e-4    | -1.073e+01  | 0.0047              | 571.0                         | 2.83%                             | 711.9                             | 2.38%                                |
|         | 3    |       | ERE(NR)/IR3/MCF7-ERa-ChIP-Seq(Unpublished)/Homer            | 1e-4    | -1.005e+01  | 0.0062              | 549.0                         | 2.73%                             | 687.0                             | 2.30%                                |
| HI      | 1    |       | BORIS(Zf)/K562-CTCF-ChIP-Seq(GSE32465)/Homer                | 1e-5    | -1.233e+01  | 0.0019              | 408.0                         | 2.03%                             | 485.4                             | 1.62%                                |
|         | 2    |       | RAR-RXR(NR)/DR5/ES-RAR-ChIP-Seq(GSE56893)/Homer             | 1e-3    | -9.053e+00  | 0.0250              | 466.0                         | 2.32%                             | 584.3                             | 1.95%                                |
|         | 3    |       | RUNX2(Runt)/PCa-RUNX2-ChIP-Seq(GSE33889)/Homer              | 1e-3    | -8.397e+00  | 0.0322              | 1941.0                        | 9.68%                             | 2681.6                            | 8.96%                                |

b

## H3K4me3 – de novo motifs

|         | Rank | Motif | P-value | log P-value | % of Targets | % of Background | STD(Bg STD)     | Best Match/Details                                                                                                                  |
|---------|------|-------|---------|-------------|--------------|-----------------|-----------------|-------------------------------------------------------------------------------------------------------------------------------------|
| Sham    | 1    |       | 1e-35   | -8.061e+01  | 0.19%        | 0.01%           | 53.8bp (69.4bp) | CRX(Homeobox)/Retina-Crx-ChIP-Seq(GSE20012)/Homer(0.638)<br><a href="#">More Information</a>   <a href="#">Similar Motifs Found</a> |
|         | 2    |       | 1e-25   | -5.780e+01  | 0.15%        | 0.01%           | 54.5bp (50.6bp) | Atf4(bZIP)/MEF-Atf4-ChIP-Seq(GSE35681)/Homer(0.644)<br><a href="#">More Information</a>   <a href="#">Similar Motifs Found</a>      |
|         | 3    |       | 1e-24   | -5.637e+01  | 0.60%        | 0.20%           | 53.8bp (53.9bp) | Zfp809(Zf)/ES-Zfp809-ChIP-Seq(GSE70799)/Homer(0.648)<br><a href="#">More Information</a>   <a href="#">Similar Motifs Found</a>     |
| Hypoxic | 1    |       | 1e-26   | -6.132e+01  | 0.11%        | 0.01%           | 58.4bp (26.6bp) | PB0112.1_E2F2_2/Jaspar(0.673)<br><a href="#">More Information</a>   <a href="#">Similar Motifs Found</a>                            |
|         | 2    |       | 1e-24   | -5.548e+01  | 0.15%        | 0.01%           | 47.8bp (0.0bp)  | PH0006.1_Barhl2/Jaspar(0.691)<br><a href="#">More Information</a>   <a href="#">Similar Motifs Found</a>                            |
|         | 3    |       | 1e-21   | -4.890e+01  | 0.12%        | 0.01%           | 48.4bp (65.3bp) | PB0108.1_Atf1_2/Jaspar(0.637)<br><a href="#">More Information</a>   <a href="#">Similar Motifs Found</a>                            |
| HI      | 1    |       | 1e-31   | -7.350e+01  | 0.16%        | 0.01%           | 57.0bp (50.0bp) | Foxq1/MA0040.1/Jaspar(0.761)<br><a href="#">More Information</a>   <a href="#">Similar Motifs Found</a>                             |
|         | 2    |       | 1e-26   | -6.099e+01  | 0.14%        | 0.01%           | 53.0bp (34.6bp) | TBX4/MA0806.1/Jaspar(0.649)<br><a href="#">More Information</a>   <a href="#">Similar Motifs Found</a>                              |
|         | 3    |       | 1e-22   | -5.198e+01  | 0.12%        | 0.01%           | 51.1bp (36.1bp) | Foxq1/MA0040.1/Jaspar(0.602)<br><a href="#">More Information</a>   <a href="#">Similar Motifs Found</a>                             |

**Supplementary Figure 4.** Motif analysis results show the top three enriched known and de novo motifs for H3K4me3.



a

H3K27ac – known motifs

Sham

| Rank | Motif | Name                                                | P-value | log P-value | q-value (Benjamini) | # Target Sequences with Motif | % of Targets Sequences with Motif | # Background Sequences with Motif | % of Background Sequences with Motif |
|------|-------|-----------------------------------------------------|---------|-------------|---------------------|-------------------------------|-----------------------------------|-----------------------------------|--------------------------------------|
| 1    |       | HRE(HSF)/Striatum-HSF1-ChIP-Seq(GSE38000)/Homer     | 1e-7    | -1.632e+01  | 0.0000              | 2116.0                        | 2.18%                             | 1888.8                            | 1.95%                                |
| 2    |       | HRE(HSF)/HepG2-HSF1-ChIP-Seq(GSE31477)/Homer        | 1e-6    | -1.568e+01  | 0.0000              | 1373.0                        | 1.42%                             | 1194.2                            | 1.23%                                |
| 3    |       | Pdx1(Homeobox)/Islet-Pdx1-ChIP-Seq(SRA008281)/Homer | 1e-5    | -1.324e+01  | 0.0003              | 10435.0                       | 10.76%                            | 10003.7                           | 10.31%                               |

| Rank | Motif | Name                                                             | P-value | log P-value | q-value (Benjamini) | # Target Sequences with Motif | % of Targets Sequences with Motif | # Background Sequences with Motif | % of Background Sequences with Motif |
|------|-------|------------------------------------------------------------------|---------|-------------|---------------------|-------------------------------|-----------------------------------|-----------------------------------|--------------------------------------|
| 1    |       | EBF1(EBF)/Near-E2A-ChIP-Seq(GSE21512)/Homer                      | 1e-6    | -1.512e+01  | 0.0001              | 6679.0                        | 8.49%                             | 6297.9                            | 8.00%                                |
| 2    |       | Tgif2(Homeobox)/mES-Tgif2-ChIP-Seq(GSE55404)/Homer               | 1e-5    | -1.155e+01  | 0.0021              | 27155.0                       | 34.53%                            | 26600.4                           | 33.80%                               |
| 3    |       | Hoxa10(Homeobox)/ChickenMSG-Hoxa10.Flag-ChIP-Seq(GSE86088)/Homer | 1e-4    | -1.084e+01  | 0.0028              | 4832.0                        | 6.14%                             | 4562.6                            | 5.80%                                |

| Rank | Motif | Name                                                  | P-value | log P-value | q-value (Benjamini) | # Target Sequences with Motif | % of Targets Sequences with Motif | # Background Sequences with Motif | % of Background Sequences with Motif |
|------|-------|-------------------------------------------------------|---------|-------------|---------------------|-------------------------------|-----------------------------------|-----------------------------------|--------------------------------------|
| 1    |       | ZNF143(STAF/Zf)/CUTLL-ZNF143-ChIP-Seq(GSE29600)/Homer | 1e-6    | -1.432e+01  | 0.0003              | 2083.0                        | 4.22%                             | 1874.8                            | 3.80%                                |
| 2    |       | MYNN(Zf)/HEK293-MYNN-eGFP-ChIP-Seq(Encode)/Homer      | 1e-6    | -1.406e+01  | 0.0003              | 1374.0                        | 2.79%                             | 1206.2                            | 2.45%                                |
| 3    |       | E2A(bHLH)/proBcell-E2A-ChIP-Seq(GSE21978)/Homer       | 1e-6    | -1.390e+01  | 0.0003              | 6775.0                        | 13.74%                            | 6419.7                            | 13.01%                               |

b

H3K27ac – de novo motifs

Sham

| Rank | Motif | P-value | log P-value | % of Targets | % of Background | STD(Bg STD)     | Best Match/Details                                                                                                                      |
|------|-------|---------|-------------|--------------|-----------------|-----------------|-----------------------------------------------------------------------------------------------------------------------------------------|
| 1    |       | 1e-45   | -1.040e+02  | 0.04%        | 0.00%           | 56.0bp (20.0bp) | PB0046.1_Mybl1_1/Jaspar(0.654)<br><a href="#">More Information</a>   <a href="#">Similar Motifs Found</a>                               |
| 2    |       | 1e-35   | -8.256e+01  | 0.03%        | 0.00%           | 53.6bp (52.0bp) | Eomes(T-box)/H9-Eomes-ChIP-Seq(GSE26097)/Homer(0.687)<br><a href="#">More Information</a>   <a href="#">Similar Motifs Found</a>        |
| 3    |       | 1e-34   | -7.910e+01  | 0.03%        | 0.00%           | 52.5bp (11.5bp) | AP-2alpha(AP2)/Hela-AP2alpha-ChIP-Seq(GSE31477)/Homer(0.592)<br><a href="#">More Information</a>   <a href="#">Similar Motifs Found</a> |

| Rank | Motif | P-value | log P-value | % of Targets | % of Background | STD(Bg STD)     | Best Match/Details                                                                                                                    |
|------|-------|---------|-------------|--------------|-----------------|-----------------|---------------------------------------------------------------------------------------------------------------------------------------|
| 1    |       | 1e-23   | -5.329e+01  | 1.58%        | 1.18%           | 54.6bp (53.6bp) | HOXA1(Homeobox)/mES-Hoxa1-ChIP-Seq(SRP084292)/Homer(0.798)<br><a href="#">More Information</a>   <a href="#">Similar Motifs Found</a> |
| 2    |       | 1e-23   | -5.303e+01  | 1.77%        | 1.34%           | 56.0bp (55.3bp) | PB0195.1_Zbtb3_2/Jaspar(0.671)<br><a href="#">More Information</a>   <a href="#">Similar Motifs Found</a>                             |
| 3    |       | 1e-22   | -5.258e+01  | 0.03%        | 0.00%           | 60.5bp (24.1bp) | PB0033.1_Irf3_1/Jaspar(0.776)<br><a href="#">More Information</a>   <a href="#">Similar Motifs Found</a>                              |

| Rank | Motif | P-value | log P-value | % of Targets | % of Background | STD(Bg STD)     | Best Match/Details                                                                                         |
|------|-------|---------|-------------|--------------|-----------------|-----------------|------------------------------------------------------------------------------------------------------------|
| 1    |       | 1e-31   | -7.295e+01  | 0.10%        | 0.01%           | 54.3bp (31.7bp) | POL009.1_DCE_S_II/Jaspar(0.614)<br><a href="#">More Information</a>   <a href="#">Similar Motifs Found</a> |
| 2    |       | 1e-29   | -6.888e+01  | 0.06%        | 0.00%           | 49.0bp (70.0bp) | EGR1/MA0162.3/Jaspar(0.666)<br><a href="#">More Information</a>   <a href="#">Similar Motifs Found</a>     |
| 3    |       | 1e-29   | -6.879e+01  | 5.11%        | 4.06%           | 54.0bp (57.1bp) | PB0198.1_Zfp128_2/Jaspar(0.737)<br><a href="#">More Information</a>   <a href="#">Similar Motifs Found</a> |

**Supplementary Figure 5.** Motif analysis results show the top three enriched known and de novo motifs for H3K27ac.
