# Supplementary material for: G4 Landscape Dynamics Underlies Neuroprotective Responses in Neonatal Hypoxic-Ischemic Brain Injury
Source: Research Square preprint supplement (doi:10.21203/rs.3.rs-6683237/v1), 2025-06-19
Supplement: Supplementary file 2 [file bcdd7714c04ed9104e001a3f.xlsx]

## Sheet: promoter_HI_vs_sham (2)
promoter_idx	gene_id	gene_symbol	G4_contra_score	G4_ipsi_score	G4_sham_score	h3k27ac_sham_score	h3k27ac_contra_score	h3k27ac_ipsi_score	h3k4me3_sham_score	h3k4me3_contra_score	h3k4me3_ipsi_score	has_cpg	X	log2FoldChange	pvalue	padj	gene_name	RNA_sham_1	RNA_sham_2	RNA_ipsi_1	RNA_ipsi_2	Condition2	regulated
433	ENSMUSG00000056708	Ier5	32	82	192	1769	877	485	1249	1082	1045	TRUE	685	1.17975	1.90619e-30	2.00161e-28	Ier5	560.602	575.211	1301.51	1271.5	IPSI_sham	Upregulated
932	ENSMUSG00000041779	Tram2	164	142	144	368	529	163	529	725	421	FALSE	540	1.19084	1.18854e-16	5.36478e-15	Tram2	285.034	301.034	649.313	687.818	IPSI_sham	Upregulated
948	ENSMUSG00000073676	Hspe1	123	67	439	1374	1171	546	1271	1461	942	TRUE	768	1.23011	1.18661e-55	3.15279e-53	Hspe1	1040.22	1003.82	2390.43	2405.26	IPSI_sham	Upregulated
1719	ENSMUSG00000102425	Gm26616	91	39	347	2217	951	708	1186	1497	955	FALSE	961	1.86408	0.00204962	0.0144928		12.6214	12.31	47.1353	43.671	IPSI_sham	Upregulated
2042	ENSMUSG00000045005	Fzd5	161	108	248	89	74	91	508	576	875	FALSE	586	2.37275	1.13771e-20	6.77448e-19	Fzd5	53.6411	77.217	337.643	338.45	IPSI_sham	Upregulated
2128	ENSMUSG00000119799	Gm24182	0	38	49	691	373	345	1048	1124	756	FALSE	1232	1.45309	0.00106781	0.00835571		36.8125	22.3817	75.0318	87.342	IPSI_sham	Upregulated
3191	ENSMUSG00000120874		68	22	190	1046	614	333	787	971	580	TRUE	1274	2.02817	0.00286489	0.0191459		8.41429	10.0718	37.5159	37.7922	IPSI_sham	Upregulated
3199	ENSMUSG00000087213	2810408I11Rik	141	15	209	228	153	210	953	620	733	TRUE	849	2.46992	0.00366692	0.023512	2810408I11Rik	3.15536	7.83361	41.3637	19.316	IPSI_sham	Upregulated
3545	ENSMUSG00000025921	Rdh10	68	98	118	1873	1406	661	986	1057	733	TRUE	237	1.08996	2.51225e-20	1.44917e-18	Rdh10	425.973	448.754	945.592	916.251	IPSI_sham	Upregulated
3839	ENSMUSG00000085766	2810430I11Rik	96	58	133	204	126	134	299	210	413	FALSE	821	2.54298	0.0089575	0.0491595		8.41429	1.11909	39.4398	16.7965	IPSI_sham	Upregulated
4568	ENSMUSG00000043415	Otud1	79	73	224	1046	742	654	637	1180	1060	TRUE	567	1.67173	1.51215e-31	1.68363e-29	Otud1	301.863	269.7	955.212	867.541	IPSI_sham	Upregulated
4855	ENSMUSG00000027654	Fam83d	0	32	209	43	100	91	245	251	281	TRUE	287	1.18241	9.1229e-05	0.000965766	Fam83d	61.0036	71.6216	137.558	162.926	IPSI_sham	Upregulated
5263	ENSMUSG00000027381	Bcl2l11	59	55	169	772	355	280	591	769	409	TRUE	278	1.45529	1.98324e-34	2.50202e-32	Bcl2l11	463.838	395.038	1143.75	1212.71	IPSI_sham	Upregulated
5576	ENSMUSG00000044641	Pard6b	129	160	534	1313	711	308	566	799	658	TRUE	580	1.49824	1.63734e-13	5.6299e-12	Pard6b	117.8	142.124	374.197	359.446	IPSI_sham	Upregulated
6161	ENSMUSG00000099470	Gm29340	106	61	224	1265	742	489	427	417	342	TRUE	946	1.87178	0.00600033	0.0354401		9.46608	11.1909	39.4398	36.1125	IPSI_sham	Upregulated
7139	ENSMUSG00000056501	Cebpb	139	96	51	633	513	220	594	740	819	FALSE	683	2.08129	1.44437e-21	9.02804e-20	Cebpb	95.7125	89.5269	396.322	388	IPSI_sham	Upregulated
7257	ENSMUSG00000089762	Ier5l	43	52	111	1391	513	484	1070	1089	753	TRUE	861	1.21096	4.51997e-10	1.10086e-08	Ier5l	215.616	167.863	452.114	436.71	IPSI_sham	Upregulated
10489	ENSMUSG00000028121	Bcar3	41	107	148	2954	2072	1177	820	1247	928	TRUE	299	1.02983	1.06555e-06	1.6492e-05	Bcar3	160.923	139.886	333.795	281.342	IPSI_sham	Upregulated
10705	ENSMUSG00000037211	Spry1	46	32	39	1354	892	527	1003	966	895	TRUE	468	1.12361	2.90251e-16	1.27886e-14	Spry1	374.436	336.845	776.29	774.32	IPSI_sham	Upregulated
11335	ENSMUSG00000044468	Tent5c	125	40	196	242	261	37	683	488	436	FALSE	578	1.32264	7.49888e-14	2.67821e-12	Tent5c	183.011	250.675	556.005	527.411	IPSI_sham	Upregulated
12038	ENSMUSG00000034640	Tiparp	163	193	393	1981	1245	962	1180	1238	1060	TRUE	419	1.62553	2.40215e-76	9.15743e-74	Tiparp	844.584	740.835	2415.45	2479.17	IPSI_sham	Upregulated
12150	ENSMUSG00000014599	Csf1	0	27	40	793	839	466	506	447	465	TRUE	68	2.14631	3.30418e-112	2.36499e-109	Csf1	519.582	496.875	2170.15	2329.68	IPSI_sham	Upregulated
12461	ENSMUSG00000050931	Sgms2	72	64	72	297	141	148	606	697	467	TRUE	641	1.6503	3.62215e-24	2.69144e-22	Sgms2	176.7	226.056	622.379	639.948	IPSI_sham	Upregulated
12970	ENSMUSG00000027947	Il6ra	0	17	45	446	370	218	318	322	310	FALSE	294	1.12911	6.42953e-11	1.7122e-09	Il6ra	192.477	229.413	493.478	429.151	IPSI_sham	Upregulated
12971	ENSMUSG00000105941	Gm42809	0	17	45	446	370	218	318	322	310	TRUE	1010	3.89412	0.000132883	0.00135243		1.05179	3.35726	34.63	30.2338	IPSI_sham	Upregulated
12999	ENSMUSG00000105350	4930537H20Rik	46	37	216	2326	1840	1047	1288	1376	1218	TRUE	1000	1.2336	0.00343031	0.0222668		28.3982	41.4062	95.2326	68.8658	IPSI_sham	Upregulated
13021	ENSMUSG00000105813	Gm42928	299	41	422	2007	1030	746	863	1353	1201	FALSE	1007	1.79323	1.24808e-06	1.90482e-05		37.8643	32.4535	106.776	136.892	IPSI_sham	Upregulated
13023	ENSMUSG00000106022	Gm42929	66	41	84	2007	1030	746	863	1353	1201	TRUE	1012	2.23954	4.73869e-24	3.47689e-22		99.9197	76.0979	405.941	426.632	IPSI_sham	Upregulated
13031	ENSMUSG00000028128	F3	36	36	39	971	530	342	809	788	810	TRUE	300	1.40186	7.58541e-39	1.18238e-36	F3	478.563	445.397	1242.83	1200.11	IPSI_sham	Upregulated
13199	ENSMUSG00000034762	Glis1	71	84	34	131	76	130	447	538	317	TRUE	423	1.1306	0.00433571	0.0269949	Glis1	37.8643	34.6917	89.4609	69.7056	IPSI_sham	Upregulated
13382	ENSMUSG00000039911	Spsb1	65	52	164	661	630	226	709	944	825	TRUE	519	1.38654	4.0556e-24	2.99449e-22	Spsb1	326.054	298.796	860.941	774.32	IPSI_sham	Upregulated
13609	ENSMUSG00000028862	Map3k6	121	61	163	458	661	226	278	397	396	TRUE	316	1.21047	3.02873e-05	0.000361674	Map3k6	88.35	69.3834	178.922	186.442	IPSI_sham	Upregulated
13653	ENSMUSG00000046694	Tent5b	43	36	92	0	0	0	93	119	41	TRUE	607	3.46122	3.79469e-05	0.000441172	Tent5b	5.25893	2.23817	54.8309	28.5541	IPSI_sham	Upregulated
13856	ENSMUSG00000037242	Clic4	403	127	487	1131	850	419	1139	936	480	TRUE	469	1.06994	2.09038e-53	5.39072e-51	Clic4	1400.98	1378.71	2925.28	2910.84	IPSI_sham	Upregulated
13924	ENSMUSG00000038007	Acer2	47	44	116	267	145	107	386	480	507	TRUE	486	1.22184	6.61106e-07	1.06164e-05	Acer2	88.35	111.909	258.763	208.277	IPSI_sham	Upregulated
14244	ENSMUSG00000028645	Slc2a1	110	78	178	903	710	489	683	1056	643	TRUE	312	1.08329	3.43702e-45	6.88819e-43	Slc2a1	1084.39	1038.51	2226.9	2271.73	IPSI_sham	Upregulated
14665	ENSMUSG00000042608	Stk40	84	31	258	1583	1047	972	1466	1417	989	TRUE	551	1.02735	2.25181e-25	1.77873e-23	Stk40	673.143	679.286	1345.76	1410.07	IPSI_sham	Upregulated
14668	ENSMUSG00000073758	Sh3d21	61	32	113	468	448	242	423	554	300	TRUE	770	1.17277	0.00281573	0.0188929	Sh3d21	32.6054	42.5253	89.4609	79.7835	IPSI_sham	Upregulated
14749	ENSMUSG00000003032	Klf4	144	22	349	826	642	556	920	712	514	FALSE	27	3.89845	3.35124e-81	1.39922e-78	Klf4	209.305	199.197	3109.97	2983.06	IPSI_sham	Upregulated
14787	ENSMUSG00000038816	Ctnnal1	68	82	45	582	431	364	1074	829	442	TRUE	500	1.16496	3.89167e-26	3.22669e-24	Ctnnal1	652.107	524.852	1334.22	1307.61	IPSI_sham	Upregulated
15109	ENSMUSG00000028413	B4galt1	106	55	284	809	505	437	712	966	710	TRUE	306	1.00503	9.90313e-12	2.87995e-10	B4galt1	315.536	309.987	659.895	596.277	IPSI_sham	Upregulated
15557	ENSMUSG00000120122		48	104	29	592	431	213	433	683	399	TRUE	1252	3.87706	0.00719934	0.041123		0	2.23817	15.3911	16.7965	IPSI_sham	Upregulated
15560	ENSMUSG00000120228		0	61	84	3645	2923	1325	1508	1701	1504	TRUE	1255	1.19684	0.00192039	0.0137519		45.2268	38.049	103.89	87.342	IPSI_sham	Upregulated
16358	ENSMUSG00000049907	Rasl11b	132	55	128	727	517	286	1193	854	769	TRUE	633	1.05922	1.62968e-24	1.23715e-22	Rasl11b	564.809	594.235	1180.31	1233.71	IPSI_sham	Upregulated
16611	ENSMUSG00000085565	Gm15721	94	49	93	848	775	310	721	812	756	FALSE	818	2.11695	0.00144229	0.0108271		5.25893	14.5481	51.9451	33.5931	IPSI_sham	Upregulated
17371	ENSMUSG00000041930	Fam222a	112	49	338	480	463	205	716	548	532	TRUE	545	1.07677	2.10386e-07	3.6528e-06	Fam222a	172.493	155.553	384.778	308.216	IPSI_sham	Upregulated
17429	ENSMUSG00000092183	4930515G01Rik	37	98	137	1718	1654	925	1741	1706	1317	FALSE	891	1.32105	0.0044043	0.0273491	4930515G01Rik	27.3464	26.8581	83.6893	52.0693	IPSI_sham	Upregulated
18783	ENSMUSG00000018143	Mafk	78	55	217	442	436	250	997	1089	689	TRUE	82	1.50919	3.24823e-20	1.84938e-18	Mafk	207.202	238.365	682.019	586.199	IPSI_sham	Upregulated
18842	ENSMUSG00000120465		44	50	99	560	348	207	753	1033	659	TRUE	1261	1.8387	0.00566097	0.0337828		8.41429	12.31	25.0106	48.7099	IPSI_sham	Upregulated
20013	ENSMUSG00000037621	Atoh8	0	38	36	263	298	118	241	352	232	TRUE	480	1.22701	7.73799e-05	0.000833816	Atoh8	77.8322	50.3589	145.254	155.368	IPSI_sham	Upregulated
20042	ENSMUSG00000038451	Spsb2	0	32	84	791	482	229	357	269	349	TRUE	492	1.26865	2.64527e-05	0.000319803	Spsb2	68.3661	63.7879	152.949	165.446	IPSI_sham	Upregulated
20136	ENSMUSG00000108126	Gm43909	0	41	48	1532	847	264	759	799	755	TRUE	1045	2.21584	5.31379e-05	0.000595071		21.0357	8.95269	71.184	68.8658	IPSI_sham	Upregulated
21268	ENSMUSG00000030103	Bhlhe40	180	58	401	2604	1315	668	553	727	598	FALSE	336	1.31517	6.05076e-50	1.41475e-47	Bhlhe40	677.35	697.191	1729.58	1690.57	IPSI_sham	Upregulated
21469	ENSMUSG00000036390	Gadd45a	69	35	199	986	560	362	1098	1323	688	FALSE	454	2.1149	1.12453e-17	5.46256e-16	Gadd45a	67.3143	69.3834	312.632	279.662	IPSI_sham	Upregulated
22068	ENSMUSG00000019577	Pdk4	0	71	39	403	224	328	300	291	281	TRUE	89	1.72514	4.89434e-22	3.14385e-20	Pdk4	164.079	189.126	584.863	582	IPSI_sham	Upregulated
22283	ENSMUSG00000059659	Gm10069	129	22	267	1306	569	755	1352	1433	1228	TRUE	701	1.24906	0.000357947	0.00325653	Gm10069	45.2268	44.7635	95.2326	118.416	IPSI_sham	Upregulated
23561	ENSMUSG00000049791	Fzd4	51	38	132	504	419	234	604	794	608	TRUE	632	1.01376	6.78461e-19	3.55149e-17	Fzd4	511.168	561.782	1105.28	1060.7	IPSI_sham	Upregulated
24315	ENSMUSG00000002983	Relb	99	65	103	852	584	270	860	767	538	TRUE	26	1.19434	5.76982e-08	1.07982e-06	Relb	160.923	133.171	360.73	313.255	IPSI_sham	Upregulated
24329	ENSMUSG00000039133	9330171B17Rik	94	32	113	154	0	74	210	173	173	TRUE	507	1.36798	0.00657571	0.0382587		18.9322	21.2626	56.7548	47.0303	IPSI_sham	Upregulated
25519	ENSMUSG00000008318	Relt	0	58	193	291	223	148	553	620	620	TRUE	51	1.1925	1.74458e-06	2.61367e-05	Relt	88.35	95.1224	204.894	214.156	IPSI_sham	Upregulated
26012	ENSMUSG00000034957	Cebpa	0	49	80	605	280	420	386	513	529	TRUE	429	1.33659	2.16424e-09	4.93205e-08	Cebpa	174.596	115.266	395.36	338.45	IPSI_sham	Upregulated
26083	ENSMUSG00000056043	Rgs9bp	0	23	104	926	521	112	1058	1389	912	FALSE	679	1.01058	0.00101369	0.00798298	Rgs9bp	59.9518	73.8597	121.205	147.809	IPSI_sham	Upregulated
26354	ENSMUSG00000038618	Rassf7	58	51	184	0	0	35	272	265	143	TRUE	497	1.39154	0.00780485	0.0440154	Rassf7	24.1911	16.7863	54.8309	52.9091	IPSI_sham	Upregulated
26777	ENSMUSG00000097974	Gm10605	104	14	72	188	84	63	143	253	200	TRUE	940	1.62815	1.56621e-06	2.36361e-05		33.6572	50.3589	136.596	122.615	IPSI_sham	Upregulated
27093	ENSMUSG00000008384	Sertad1	179	69	355	1758	1228	842	1269	938	779	TRUE	52	1.23581	0.000446943	0.00394344	Sertad1	37.8643	49.2398	105.814	99.0995	IPSI_sham	Upregulated
27640	ENSMUSG00000019789	Hey2	87	60	141	421	188	238	721	646	476	TRUE	90	1.00389	5.69227e-07	9.21696e-06	Hey2	166.182	147.719	302.051	327.532	IPSI_sham	Upregulated
28021	ENSMUSG00000020105	Lrig3	37	51	87	403	193	105	648	398	489	TRUE	98	1.12188	4.40104e-06	6.14219e-05	Lrig3	88.35	111.909	204.894	230.113	IPSI_sham	Upregulated
28314	ENSMUSG00000036478	Btg1	56	76	272	3125	1389	750	1959	1497	1372	TRUE	456	1.12319	1.36843e-58	3.87045e-56	Btg1	1741.76	1893.49	3798.72	4115.15	IPSI_sham	Upregulated
28664	ENSMUSG00000035873	Pawr	0	114	65	132	135	91	937	602	710	TRUE	449	1.14804	1.16318e-05	0.000150037	Pawr	112.541	79.4552	238.562	188.121	IPSI_sham	Upregulated
28708	ENSMUSG00000020185	E2f7	0	87	180	775	352	210	849	620	643	TRUE	102	1.23149	1.07479e-06	1.66057e-05	E2f7	83.0911	124.219	256.839	229.273	IPSI_sham	Upregulated
28757	ENSMUSG00000020205	Phlda1	178	61	157	1369	718	546	1060	1035	800	FALSE	103	1.44927	4.64759e-43	8.4456e-41	Phlda1	515.375	500.232	1403.48	1370.6	IPSI_sham	Upregulated
29166	ENSMUSG00000019850	Tnfaip3	27	28	78	1030	471	304	1272	1234	1022	TRUE	92	2.02451	2.85134e-46	5.98815e-44	Tnfaip3	215.616	251.795	961.946	938.086	IPSI_sham	Upregulated
29437	ENSMUSG00000000732	Icosl	48	46	52	230	135	105	422	641	342	TRUE	8	1.31883	5.63251e-07	9.12863e-06	Icosl	82.0393	83.9315	188.541	225.074	IPSI_sham	Upregulated
29741	ENSMUSG00000120325		37	78	158	2997	2536	1285	1378	1690	1091	FALSE	1258	2.41151	0.000373053	0.00336775		6.31072	10.0718	50.0212	36.9524	IPSI_sham	Upregulated
29777	ENSMUSG00000120659		227	38	424	1635	1422	716	1169	1778	1053	TRUE	1266	2.51113	0.00625653	0.0367123		4.20714	4.47635	33.6681	15.9567	IPSI_sham	Upregulated
30338	ENSMUSG00000005483	Dnajb1	251	35	293	2070	1162	667	974	914	733	TRUE	41	2.30485	1.79423e-229	3.14636e-226	Dnajb1	881.397	965.772	4651.97	4471.24	IPSI_sham	Upregulated
31958	ENSMUSG00000110030	Gm45546	78	60	132	1421	939	360	185	191	65	TRUE	1080	3.04458	0.00537533	0.0323423		2.10357	2.23817	17.315	18.4762	IPSI_sham	Upregulated
32060	ENSMUSG00000071076	Jund	155	69	276	3004	2315	1685	1226	1100	1216	TRUE	746	1.4334	3.88907e-73	1.43576e-70	Jund	1142.24	1179.52	3304.28	2967.95	IPSI_sham	Upregulated
32626	ENSMUSG00000103593	Gm37352	22	33	81	1661	784	348	224	288	167	TRUE	976	2.78961	2.59678e-31	2.82839e-29		64.159	66.0261	461.734	438.39	IPSI_sham	Upregulated
33138	ENSMUSG00000063060	Sox7	63	49	35	172	224	58	353	91	114	TRUE	711	1.33509	1.52439e-14	5.79234e-13	Sox7	214.564	243.961	580.053	576.121	IPSI_sham	Upregulated
33887	ENSMUSG00000021823	Vcl	119	63	308	1365	669	381	1621	1049	797	TRUE	144	1.14111	2.71106e-49	6.13435e-47	Vcl	1268.45	1135.87	2746.35	2560.63	IPSI_sham	Upregulated
34226	ENSMUSG00000022178	Ajuba	0	50	49	466	380	329	495	320	204	TRUE	153	1.52303	5.53404e-13	1.82415e-11	Ajuba	134.629	111.909	346.3	362.805	IPSI_sham	Upregulated
34985	ENSMUSG00000119970		146	69	624	1836	1151	781	1667	1813	1207	TRUE	1243	3.67184	0.000327144	0.0030075		2.10357	2.23817	32.7061	22.6753	IPSI_sham	Upregulated
35526	ENSMUSG00000032041	Tirap	0	27	49	365	186	160	403	376	223	FALSE	375	1.08886	0.000114941	0.00118739	Tirap	67.3143	96.2415	183.732	163.766	IPSI_sham	Upregulated
36274	ENSMUSG00000032374	Plod2	91	17	52	610	457	288	826	1036	1011	TRUE	387	1.20209	2.38862e-28	2.25805e-26	Plod2	552.188	538.281	1177.42	1330.29	IPSI_sham	Upregulated
37089	ENSMUSG00000050721	Plekho2	125	52	457	766	436	287	414	368	507	FALSE	639	1.25824	7.50757e-14	2.67859e-12	Plekho2	192.477	223.817	509.831	485.42	IPSI_sham	Upregulated
37369	ENSMUSG00000032515	Csrnp1	151	46	93	546	382	310	959	856	620	FALSE	391	3.22454	1.14838e-63	3.56423e-61	Csrnp1	79.9357	74.9788	744.546	704.615	IPSI_sham	Upregulated
37370	ENSMUSG00000111639	1700019L13Rik	209	73	93	546	382	541	959	856	701	TRUE	1101	2.74892	0.000203239	0.00197233		7.3625	5.59543	46.1734	41.1515	IPSI_sham	Upregulated
37688	ENSMUSG00000097155	Gm26511	33	32	114	1724	1224	481	964	878	776	FALSE	922	1.74177	0.00683723	0.0394985		16.8286	7.83361	51.9451	31.0736	IPSI_sham	Upregulated
37707	ENSMUSG00000119966		123	66	315	1629	1117	761	1395	1125	1132	TRUE	1242	2.11317	0.00895809	0.0491595		9.46608	4.47635	34.63	26.0346	IPSI_sham	Upregulated
37721	ENSMUSG00000120036		79	129	62	4057	2675	1305	1512	1598	1245	TRUE	1246	1.09406	0.00413178	0.0259509		43.1232	36.9299	91.3848	79.7835	IPSI_sham	Upregulated
38006	ENSMUSG00000091735	Gpr62	72	69	96	933	498	380	263	251	376	TRUE	882	1.23885	0.00364927	0.0234409	Gpr62	29.45	42.5253	101.004	68.8658	IPSI_sham	Upregulated
38007	ENSMUSG00000023249	Parp3	57	31	395	597	508	298	1396	976	700	TRUE	180	1.29391	2.6673e-05	0.000322023	Parp3	62.0554	55.9543	135.634	153.688	IPSI_sham	Upregulated
38284	ENSMUSG00000020275	Rel	75	64	110	1152	759	470	1160	948	845	TRUE	104	1.54749	1.62284e-29	1.64024e-27	Rel	346.038	321.178	905.191	1044.74	IPSI_sham	Upregulated
39260	ENSMUSG00000084967	Gm12296	48	27	249	1105	456	252	741	469	383	TRUE	83	-1.23786	1.56896e-20	9.23264e-19	Gm12296	674.195	617.736	284.736	263.706	IPSI_sham	Downregulated
39432	ENSMUSG00000018906	P4ha2	0	49	66	344	204	196	678	474	452	TRUE	86	1.1277	3.25826e-12	9.94971e-11	P4ha2	235.6	303.273	607.95	568.563	IPSI_sham	Upregulated
39607	ENSMUSG00000018648	Dusp14	45	49	40	564	508	274	553	672	565	TRUE	83	1.05968	3.51465e-07	5.91486e-06	Dusp14	151.457	180.173	316.48	373.723	IPSI_sham	Upregulated
39947	ENSMUSG00000041920	Slc16a6	103	31	100	1943	1228	694	884	1018	542	FALSE	544	1.33682	9.78746e-28	8.98601e-26	Slc16a6	374.436	345.798	931.163	889.376	IPSI_sham	Upregulated
40560	ENSMUSG00000078635	1700028N14Rik	95	41	372	1183	674	529	441	697	561	TRUE	788	1.94364	0.00278254	0.0187239		8.41429	14.5481	60.6026	27.7143	IPSI_sham	Upregulated
41154	ENSMUSG00000037573	Tob1	385	105	703	5901	4285	2425	1680	1647	1720	TRUE	477	1.14891	1.14543e-38	1.76196e-36	Tob1	835.118	804.623	1861.36	1776.23	IPSI_sham	Upregulated
41181	ENSMUSG00000120765		224	108	642	1219	728	470	884	736	745	TRUE	1270	2.67845	0.00522918	0.0315985		5.25893	2.23817	23.0867	25.1948	IPSI_sham	Upregulated
42352	ENSMUSG00000089827	1700023H06Rik	157	37	245	3633	3097	1856	1209	1237	906	TRUE	863	2.72591	1.91372e-27	1.72984e-25		45.2268	59.3116	341.491	348.528	IPSI_sham	Upregulated
42534	ENSMUSG00000021485	Mxd3	36	23	17	336	292	66	512	284	306	TRUE	137	1.07612	0.000422335	0.00375752	Mxd3	58.9	61.5498	127.939	125.974	IPSI_sham	Upregulated
43249	ENSMUSG00000114165	Gm47513	32	55	159	422	174	129	1187	1578	880	TRUE	1126	3.90581	5.64545e-05	0.000627169		5.25893	0	51.9451	28.5541	IPSI_sham	Upregulated
44063	ENSMUSG00000021025	Nfkbia	193	115	262	3158	2556	1428	1582	1280	1278	TRUE	121	1.44954	8.53101e-41	1.43158e-38	Nfkbia	509.064	485.684	1331.33	1385.71	IPSI_sham	Upregulated
44096	ENSMUSG00000011179	Odc1	64	40	204	1358	995	350	871	1261	1083	FALSE	63	1.83118	8.78908e-177	1.06293e-173	Odc1	1158.02	1196.3	4149.83	4225.17	IPSI_sham	Upregulated
45152	ENSMUSG00000048285	Frmd6	120	35	220	1766	1117	618	711	662	620	TRUE	620	1.01411	1.37741e-19	7.51299e-18	Frmd6	492.236	515.899	993.69	1041.39	IPSI_sham	Upregulated
45532	ENSMUSG00000112150	9530018F02Rik	156	17	350	2090	1233	781	1531	1585	1499	FALSE	1106	1.44996	0.00449136	0.0277962		22.0875	19.0245	43.2875	68.8658	IPSI_sham	Upregulated
45864	ENSMUSG00000020592	Sdc1	18	52	84	161	119	99	526	813	409	TRUE	111	1.10397	4.24052e-05	0.000486661	Sdc1	108.334	92.8842	228.943	204.078	IPSI_sham	Upregulated
46085	ENSMUSG00000120673		76	46	395	3856	3089	1389	1164	1125	823	TRUE	1267	1.93914	0.000760913	0.00623231		9.46608	17.9054	56.7548	47.8701	IPSI_sham	Upregulated
46107	ENSMUSG00000120835		116	75	328	931	415	378	669	614	584	TRUE	1272	3.61901	0.000966747	0.0076554		0	4.47635	35.592	18.4762	IPSI_sham	Upregulated
46563	ENSMUSG00000032501	Trib1	97	17	120	2041	1159	733	994	881	705	FALSE	390	1.86283	1.02818e-51	2.53945e-49	Trib1	328.157	378.251	1358.27	1210.19	IPSI_sham	Upregulated
46604	ENSMUSG00000065176	Rnu12	0	40	113	2372	1345	1043	1286	1419	845	TRUE	723	1.14508	1.57586e-05	0.000198451	Rnu12	72.5732	77.217	159.683	171.325	IPSI_sham	Upregulated
47147	ENSMUSG00000022602	Arc	107	52	130	980	286	190	334	578	349	TRUE	163	2.79292	4.22868e-100	2.4718e-97	Arc	210.357	185.768	1384.24	1363.88	IPSI_sham	Upregulated
47240	ENSMUSG00000047591	Mafa	154	59	413	0	0	0	66	133	0	TRUE	614	1.67811	0.00520686	0.0314799	Mafa	12.6214	16.7863	60.6026	33.5931	IPSI_sham	Upregulated
47321	ENSMUSG00000037465	Klf10	454	165	593	2790	2093	905	1143	944	1086	FALSE	475	1.34333	1.38899e-49	3.20492e-47	Klf10	787.788	675.928	1872.91	1844.26	IPSI_sham	Upregulated
47616	ENSMUSG00000023034	Nr4a1	33	61	56	601	415	243	741	568	643	TRUE	175	3.59715	0	0	Nr4a1	376.539	320.059	4272	4170.58	IPSI_sham	Upregulated
47735	ENSMUSG00000010830	Kdelr3	0	61	46	0	0	0	57	303	141	TRUE	62	1.15185	0.000507494	0.00440892	Kdelr3	67.3143	42.5253	104.852	139.411	IPSI_sham	Upregulated
48053	ENSMUSG00000121075		0	50	102	102	92	80	114	134	97	TRUE	1281	3.50014	2.68579e-05	0.000324143		2.10357	5.59543	52.907	33.5931	IPSI_sham	Upregulated
48664	ENSMUSG00000022945	Chaf1b	125	35	120	0	39	72	623	599	317	TRUE	172	1.23678	0.000109644	0.00113905	Chaf1b	44.175	54.8353	115.433	117.576	IPSI_sham	Upregulated
49098	ENSMUSG00000022863	Btg3	220	84	191	772	420	367	566	934	918	TRUE	168	1.3121	3.74533e-22	2.43252e-20	Btg3	347.089	331.25	778.214	905.333	IPSI_sham	Upregulated
49165	ENSMUSG00000025612	Bach1	242	52	362	1270	809	486	1271	1333	1199	TRUE	233	1.05448	7.99571e-46	1.64956e-43	Bach1	1393.62	1264.57	2748.28	2774.79	IPSI_sham	Upregulated
49437	ENSMUSG00000038037	Socs1	126	42	42	1364	901	661	937	970	488	TRUE	487	1.4361	3.39999e-05	0.000400924	Socs1	55.7447	51.478	157.759	132.693	IPSI_sham	Upregulated
49449	ENSMUSG00000022500	Litaf	260	30	429	2547	1879	1307	1452	1078	1229	TRUE	160	1.31087	3.41531e-20	1.93822e-18	Litaf	295.552	352.512	859.979	747.446	IPSI_sham	Upregulated
49527	ENSMUSG00000022528	Hes1	68	69	148	2742	1452	891	879	1000	281	TRUE	162	2.00655	5.74387e-29	5.67462e-27	Hes1	185.114	134.29	611.797	673.541	IPSI_sham	Upregulated
50108	ENSMUSG00000118572	Gm53023	86	36	239	311	241	210	594	412	532	TRUE	1172	5.41712	0.00828518	0.0462336		0	0	8.65751	8.39827	IPSI_sham	Upregulated
50433	ENSMUSG00000024206	Rfx2	82	61	545	341	161	225	970	578	286	TRUE	196	1.0569	9.91485e-09	2.06984e-07	Rfx2	216.668	188.007	448.267	394.719	IPSI_sham	Upregulated
51664	ENSMUSG00000024042	Sik1	240	125	381	1455	1493	1091	932	1309	1400	TRUE	191	1.66206	2.30704e-99	1.32644e-96	Sik1	871.931	861.697	2755.01	2731.96	IPSI_sham	Upregulated
52220	ENSMUSG00000024014	Pim1	261	49	555	1848	1216	419	1160	642	671	TRUE	190	2.04343	3.26272e-30	3.3855e-28	Pim1	167.234	128.695	637.77	584.519	IPSI_sham	Upregulated
52300	ENSMUSG00000120162		0	46	57	1906	1023	618	1397	1279	886	FALSE	1254	1.28959	2.1462e-05	0.000263741		72.5732	51.478	142.368	161.247	IPSI_sham	Upregulated
52752	ENSMUSG00000039529	Atp8b1	0	55	45	509	277	77	526	553	447	TRUE	516	1.16665	4.27617e-05	0.000490431	Atp8b1	64.159	72.7406	165.455	141.931	IPSI_sham	Upregulated
52763	ENSMUSG00000038418	Egr1	111	137	296	1160	696	781	893	829	912	TRUE	491	4.48198	0	0	Egr1	973.954	955.7	21845.8	21285.4	IPSI_sham	Upregulated
53247	ENSMUSG00000025880	Smad7	0	57	132	2076	1744	862	1251	1056	950	FALSE	236	1.30364	3.74473e-28	3.52105e-26	Smad7	532.204	452.111	1174.54	1256.38	IPSI_sham	Upregulated
53533	ENSMUSG00000024232	Bambi	245	52	229	747	589	129	610	799	1022	TRUE	199	1.23284	3.4732e-06	4.95186e-05	Bambi	158.82	85.0506	299.165	275.463	IPSI_sham	Upregulated
53756	ENSMUSG00000024486	Hbegf	101	51	153	416	247	70	515	397	507	TRUE	205	1.39619	6.70095e-29	6.58307e-27	Hbegf	357.607	408.467	991.766	1022.91	IPSI_sham	Upregulated
53920	ENSMUSG00000035283	Adrb1	73	74	72	871	792	444	720	517	446	TRUE	435	1.07324	1.2397e-14	4.75178e-13	Adrb1	306.07	324.535	657.009	669.342	IPSI_sham	Upregulated
54210	ENSMUSG00000114859	Gm47735	55	99	29	348	324	118	849	992	862	FALSE	1131	6.65981	0.000201034	0.00195418		0	0	20.2009	20.1558	IPSI_sham	Upregulated
54221	ENSMUSG00000024805	Pcgf5	55	99	29	348	324	118	849	992	862	TRUE	214	1.18293	7.13169e-19	3.72206e-17	Pcgf5	327.105	337.964	758.975	750.805	IPSI_sham	Upregulated
54888	ENSMUSG00000034765	Dusp5	0	86	110	237	186	246	561	477	242	FALSE	424	2.28611	1.26961e-41	2.18273e-39	Dusp5	130.421	153.315	725.307	657.584	IPSI_sham	Upregulated
55091	ENSMUSG00000118210	Gm50394	0	86	110	237	186	246	561	477	314	TRUE	1164	5.3456	0.00205609	0.0145252		0	1.11909	17.315	26.8745	IPSI_sham	Upregulated
55136	ENSMUSG00000118087	4833438C02Rik	0	36	133	468	284	160	741	415	458	TRUE	1161	1.62244	0.00170465	0.0124514	4833438C02Rik	15.7768	22.3817	64.4504	52.9091	IPSI_sham	Upregulated
