# Supplementary material for: G4 Landscape Dynamics Underlies Neuroprotective Responses in Neonatal Hypoxic-Ischemic Brain Injury
Source: Research Square preprint supplement (doi:10.21203/rs.3.rs-6683237/v1), 2025-06-19
Supplement: Supplementary file 3 [file c0eea55e5aabe894ae740179.xlsx]

## Sheet: cpg_HI_vs_sham (2)
cpg_idx	seqnames	start	end	G4_contra_score	G4_ipsi_score	G4_sham_score	gene_id	h3k27ac_sham_score	h3k27ac_contra_score	h3k27ac_ipsi_score	h3k4me3_sham_score	h3k4me3_contra_score	h3k4me3_ipsi_score	has_promoter	X	log2FoldChange	pvalue	padj	gene_name	RNA_sham_1	RNA_sham_2	RNA_ipsi_1	RNA_ipsi_2	Condition2	regulated
52	chr1	16174990	16176515	68	98	118	ENSMUSG00000025921	1873	1406	661	986	1057	733	TRUE	237	1.08996	2.51225e-20	1.44917e-18	Rdh10	425.973	448.754	945.592	916.251	IPSI_sham	Upregulated
193	chr1	55126570	55127799	123	67	439	ENSMUSG00000073676	1374	1171	546	1271	1461	942	TRUE	768	1.23011	1.18661e-55	3.15279e-53	Hspe1	1040.22	1003.82	2390.43	2405.26	IPSI_sham	Upregulated
241	chr1	64729694	64730744	141	15	209	ENSMUSG00000087213	228	153	210	953	620	733	TRUE	849	2.46992	0.00366692	0.023512	2810408I11Rik	3.15536	7.83361	41.3637	19.316	IPSI_sham	Upregulated
403	chr1	91340103	91341102	68	22	150	ENSMUSG00000120874	1046	614	333	787	944	580	TRUE	1274	2.02817	0.00286489	0.0191459		8.41429	10.0718	37.5159	37.7922	IPSI_sham	Upregulated
616	chr1	154974072	154975484	32	82	192	ENSMUSG00000056708	1769	877	485	1249	1082	1045	TRUE	685	1.17975	1.90619e-30	2.00161e-28	Ier5	560.602	575.211	1301.51	1271.5	IPSI_sham	Upregulated
944	chr2	19662351	19663929	79	73	224	ENSMUSG00000043415	1046	742	508	637	1180	1060	TRUE	567	1.67173	1.51215e-31	1.68363e-29	Otud1	301.863	269.7	955.212	867.541	IPSI_sham	Upregulated
1094	chr2	30362365	30364716	43	91	111	ENSMUSG00000089762	1391	513	484	1070	1089	753	TRUE	861	1.21096	4.51997e-10	1.10086e-08	Ier5l	215.616	167.863	452.114	436.71	IPSI_sham	Upregulated
1456	chr2	92219327	92219888	57	47	92	ENSMUSG00000099093	1039	566	487	478	607	472	TRUE	942	3.1593	0.0066491	0.0386088	Mir7000	0	4.47635	18.277	20.9957	IPSI_sham	Upregulated
1547	chr2	116806050	116806589	106	61	224	ENSMUSG00000099470	1265	742	489	427	417	342	TRUE	946	1.87178	0.00600033	0.0354401		9.46608	11.1909	39.4398	36.1125	IPSI_sham	Upregulated
1585	chr2	119168274	119168696	79	35	157	ENSMUSG00000074912	251	198	111	526	340	155	TRUE	782	1.34206	0.00184273	0.0132717	Gm14207	33.6572	24.6199	66.3742	81.4632	IPSI_sham	Upregulated
1678	chr2	127967546	127970233	221	130	510	ENSMUSG00000027381	772	723	399	591	769	409	TRUE	278	1.45529	1.98324e-34	2.50202e-32	Bcl2l11	463.838	395.038	1143.75	1212.71	IPSI_sham	Upregulated
1836	chr2	152576938	152577218	42	44	145	ENSMUSG00000042745	826	598	0	66	82	89	TRUE	556	1.92653	2.93699e-45	5.95412e-43	Id1	361.814	395.038	1525.65	1351.28	IPSI_sham	Upregulated
2038	chr2	167530473	167532104	139	96	51	ENSMUSG00000006462	633	513	220	594	740	819	TRUE	47	3.15316	3.27415e-10	8.13828e-09	A530013C23Rik	11.5696	11.1909	107.738	94.9004	IPSI_sham	Upregulated
2043	chr2	167922441	167923479	129	160	534	ENSMUSG00000044641	1313	711	308	494	799	658	TRUE	580	1.49824	1.63734e-13	5.6299e-12	Pard6b	117.8	142.124	374.197	359.446	IPSI_sham	Upregulated
2270	chr3	37693896	37695298	46	32	39	ENSMUSG00000037211	1354	892	527	1003	966	895	TRUE	468	1.12361	2.90251e-16	1.27886e-14	Spry1	374.436	336.845	776.29	774.32	IPSI_sham	Upregulated
2350	chr3	65435136	65436888	163	193	393	ENSMUSG00000034640	1981	1245	962	1180	1238	1060	TRUE	419	1.62553	2.40215e-76	9.15743e-74	Tiparp	844.584	740.835	2415.45	2479.17	IPSI_sham	Upregulated
2480	chr3	89820103	89820686	0	17	45	ENSMUSG00000105941	446	370	218	318	322	260	TRUE	1010	3.89412	0.000132883	0.00135243		1.05179	3.35726	34.63	30.2338	IPSI_sham	Upregulated
2492	chr3	90200404	90200724	46	37	216	ENSMUSG00000105350	2326	1840	1047	1209	1376	1218	TRUE	1000	1.2336	0.00343031	0.0222668		28.3982	41.4062	95.2326	68.8658	IPSI_sham	Upregulated
2663	chr3	107667306	107667602	0	27	40	ENSMUSG00000014599	793	839	466	506	447	465	TRUE	68	2.14631	3.30418e-112	2.36499e-109	Csf1	519.582	496.875	2170.15	2329.68	IPSI_sham	Upregulated
2713	chr3	121219634	121221155	299	118	422	ENSMUSG00000106022	2007	1030	785	863	1353	1201	TRUE	1012	2.23954	4.73869e-24	3.47689e-22		99.9197	76.0979	405.941	426.632	IPSI_sham	Upregulated
2715	chr3	121516968	121517495	36	36	39	ENSMUSG00000028128	971	530	342	809	788	810	TRUE	300	1.40186	7.58541e-39	1.18238e-36	F3	478.563	445.397	1242.83	1200.11	IPSI_sham	Upregulated
2721	chr3	122086805	122087829	41	107	148	ENSMUSG00000028121	2954	2072	1177	820	1247	928	TRUE	299	1.02983	1.06555e-06	1.6492e-05	Bcar3	160.923	139.886	333.795	281.342	IPSI_sham	Upregulated
2765	chr3	131195726	131196136	72	64	72	ENSMUSG00000050931	297	141	148	606	697	467	TRUE	641	1.6503	3.62215e-24	2.69144e-22	Sgms2	176.7	226.056	622.379	639.948	IPSI_sham	Upregulated
2766	chr3	131196284	131196637	72	64	72	ENSMUSG00000050931	297	141	148	606	697	467	TRUE	641	1.6503	3.62215e-24	2.69144e-22	Sgms2	176.7	226.056	622.379	639.948	IPSI_sham	Upregulated
2968	chr4	40853511	40854604	106	55	284	ENSMUSG00000028413	809	505	437	712	966	710	TRUE	306	1.00503	9.90313e-12	2.87995e-10	B4galt1	315.536	309.987	659.895	596.277	IPSI_sham	Upregulated
3104	chr4	56864600	56865514	68	82	45	ENSMUSG00000038816	548	431	364	1048	829	442	TRUE	500	1.16496	3.89167e-26	3.22669e-24	Ctnnal1	652.107	524.852	1334.22	1307.61	IPSI_sham	Upregulated
3176	chr4	86792271	86792957	47	44	116	ENSMUSG00000038007	146	61	55	386	480	507	TRUE	486	1.22184	6.61106e-07	1.06164e-05	Acer2	88.35	111.909	258.763	208.277	IPSI_sham	Upregulated
3202	chr4	89576361	89577047	0	45	62	ENSMUSG00000043753	0	64	35	231	248	118	TRUE	569	2.20472	6.96156e-18	3.41955e-16	Dmrta1	79.9357	52.5971	292.431	319.974	IPSI_sham	Upregulated
3271	chr4	107291447	107293166	71	84	34	ENSMUSG00000034762	131	76	130	447	538	317	TRUE	423	1.1306	0.00433571	0.0269949	Glis1	37.8643	34.6917	89.4609	69.7056	IPSI_sham	Upregulated
3388	chr4	118965883	118966431	110	78	178	ENSMUSG00000028645	903	710	489	683	1056	643	TRUE	312	1.08329	3.43702e-45	6.88819e-43	Slc2a1	1084.39	1038.51	2226.9	2271.73	IPSI_sham	Upregulated
3472	chr4	126056465	126057130	61	32	113	ENSMUSG00000073758	468	448	242	423	554	300	TRUE	770	1.17277	0.00281573	0.0188929	Sh3d21	32.6054	42.5253	89.4609	79.7835	IPSI_sham	Upregulated
3476	chr4	126149553	126150410	0	61	84	ENSMUSG00000120228	3645	2923	1325	1508	1701	1504	TRUE	1255	1.19684	0.00192039	0.0137519		45.2268	38.049	103.89	87.342	IPSI_sham	Upregulated
3507	chr4	128621170	128622063	52	36	86	ENSMUSG00000028794	2355	1312	1134	1134	1079	862	TRUE	315	1.27402	0.00156143	0.0115484	A3galt2	31.5536	33.5726	91.3848	66.3463	IPSI_sham	Upregulated
3528	chr4	129394437	129394765	48	104	29	ENSMUSG00000120122	592	431	213	433	683	399	TRUE	1252	3.87706	0.00719934	0.041123		0	2.23817	15.3911	16.7965	IPSI_sham	Upregulated
3592	chr4	132968391	132968812	121	61	163	ENSMUSG00000028862	458	661	226	232	397	396	TRUE	316	1.21047	3.02873e-05	0.000361674	Map3k6	88.35	69.3834	178.922	186.442	IPSI_sham	Upregulated
3599	chr4	133207399	133207622	43	36	92	ENSMUSG00000046694	0	0	0	93	119	41	TRUE	607	3.46122	3.79469e-05	0.000441172	Tent5b	5.25893	2.23817	54.8309	28.5541	IPSI_sham	Upregulated
3641	chr4	134999495	135000539	403	127	487	ENSMUSG00000037242	1131	850	419	1139	936	480	TRUE	469	1.06994	2.09038e-53	5.39072e-51	Clic4	1400.98	1378.71	2925.28	2910.84	IPSI_sham	Upregulated
3845	chr4	150038609	150039804	65	52	164	ENSMUSG00000039911	661	630	226	709	944	825	TRUE	519	1.38654	4.0556e-24	2.99449e-22	Spsb1	326.054	298.796	860.941	774.32	IPSI_sham	Upregulated
3856	chr4	150939321	150940139	99	31	260	ENSMUSG00000028967	1783	961	721	981	683	942	TRUE	317	1.60755	7.03383e-69	2.41853e-66	Errfi1	641.59	602.069	1909.46	1882.05	IPSI_sham	Upregulated
4254	chr5	64387439	64388061	63	101	130	ENSMUSG00000104947	480	186	175	927	726	446	TRUE	996	1.46649	0.00304885	0.0201903		22.0875	15.6672	49.0592	55.4286	IPSI_sham	Upregulated
4308	chr5	74355518	74356417	132	55	128	ENSMUSG00000049907	727	443	286	1193	854	769	TRUE	633	1.05922	1.62968e-24	1.23715e-22	Rasl11b	564.809	594.235	1180.31	1233.71	IPSI_sham	Upregulated
4492	chr5	111564406	111568395	73	130	99	ENSMUSG00000120465	560	403	393	934	1115	659	TRUE	1261	1.8387	0.00566097	0.0337828		8.41429	12.31	25.0106	48.7099	IPSI_sham	Upregulated
4526	chr5	114705188	114706495	112	49	338	ENSMUSG00000041930	480	463	205	553	548	532	TRUE	545	1.07677	2.10386e-07	3.6528e-06	Fam222a	172.493	155.553	384.778	308.216	IPSI_sham	Upregulated
4861	chr5	139777122	139777940	78	55	217	ENSMUSG00000018143	442	436	250	997	1049	689	TRUE	82	1.50919	3.24823e-20	1.84938e-18	Mafk	207.202	238.365	682.019	586.199	IPSI_sham	Upregulated
5310	chr6	72211359	72212583	0	38	36	ENSMUSG00000037621	263	298	118	241	352	232	TRUE	480	1.22701	7.73799e-05	0.000833816	Atoh8	77.8322	50.3589	145.254	155.368	IPSI_sham	Upregulated
5655	chr6	128414658	128415788	129	22	267	ENSMUSG00000059659	1306	569	755	1352	1366	1228	TRUE	701	1.24906	0.000357947	0.00325653	Gm10069	45.2268	44.7635	95.2326	118.416	IPSI_sham	Upregulated
5677	chr6	134960500	134961094	0	26	120	ENSMUSG00000090698	507	177	119	493	454	321	TRUE	872	3.1857	8.10665e-90	4.12053e-87	Apold1	140.939	110.79	1090.85	1203.47	IPSI_sham	Upregulated
5719	chr6	145808470	145809627	0	41	48	ENSMUSG00000108126	1532	847	264	759	799	755	TRUE	1045	2.21584	5.31379e-05	0.000595071		21.0357	8.95269	71.184	68.8658	IPSI_sham	Upregulated
6038	chr7	27186253	27187003	179	69	355	ENSMUSG00000008384	1758	1228	842	1188	938	779	TRUE	52	1.23581	0.000446943	0.00394344	Sertad1	37.8643	49.2398	105.814	99.0995	IPSI_sham	Upregulated
6159	chr7	34817325	34820165	0	49	80	ENSMUSG00000034957	605	280	420	386	513	529	TRUE	429	1.33659	2.16424e-09	4.93205e-08	Cebpa	174.596	115.266	395.36	338.45	IPSI_sham	Upregulated
6384	chr7	73040769	73041081	72	41	151	ENSMUSG00000108678	760	869	343	513	701	626	TRUE	361	-1.26056	7.36132e-05	0.000797579		117.8	146.6	45.2114	64.6667	IPSI_sham	Downregulated
6420	chr7	79359801	79360267	94	32	113	ENSMUSG00000039133	154	0	0	210	173	173	TRUE	507	1.36798	0.00657571	0.0382587		18.9322	21.2626	56.7548	47.0303	IPSI_sham	Upregulated
6483	chr7	89052646	89054159	51	38	132	ENSMUSG00000049791	504	419	234	604	794	608	TRUE	632	1.01376	6.78461e-19	3.55149e-17	Fzd4	511.168	561.782	1105.28	1060.7	IPSI_sham	Upregulated
6532	chr7	99274729	99276276	104	14	72	ENSMUSG00000097974	188	84	63	143	253	200	TRUE	940	1.62815	1.56621e-06	2.36361e-05		33.6572	50.3589	136.596	122.615	IPSI_sham	Upregulated
6548	chr7	100512064	100512650	0	58	193	ENSMUSG00000008318	291	223	148	553	620	620	TRUE	51	1.1925	1.74458e-06	2.61367e-05	Relt	88.35	95.1224	204.894	214.156	IPSI_sham	Upregulated
6869	chr7	140795522	140796163	58	51	184	ENSMUSG00000038618	0	0	35	272	265	143	TRUE	497	1.39154	0.00780485	0.0440154	Rassf7	24.1911	16.7863	54.8309	52.9091	IPSI_sham	Upregulated
7248	chr8	71061903	71062504	78	37	66	ENSMUSG00000110030	1421	939	220	38	64	65	TRUE	1080	3.04458	0.00537533	0.0323423		2.10357	2.23817	17.315	18.4762	IPSI_sham	Upregulated
7250	chr8	71082341	71082808	84	18	87	ENSMUSG00000038508	298	123	126	66	87	40	TRUE	493	7.61343	9.70045e-13	3.14141e-11	Gdf15	0	2.23817	200.085	225.074	IPSI_sham	Upregulated
7254	chr8	71151329	71153055	155	110	276	ENSMUSG00000071076	3004	2315	1685	1226	1100	1181	TRUE	746	1.4334	3.88907e-73	1.43576e-70	Jund	1142.24	1179.52	3304.28	2967.95	IPSI_sham	Upregulated
7378	chr8	84334548	84335441	251	35	293	ENSMUSG00000005483	2070	1162	667	974	914	733	TRUE	41	2.30485	1.79423e-229	3.14636e-226	Dnajb1	881.397	965.772	4651.97	4471.24	IPSI_sham	Upregulated
7404	chr8	84927372	84927737	0	33	53	ENSMUSG00000103593	1661	784	348	224	228	167	TRUE	976	2.78961	2.59678e-31	2.82839e-29		64.159	66.0261	461.734	438.39	IPSI_sham	Upregulated
7441	chr8	85706880	85707119	59	85	103	ENSMUSG00000052837	1652	1098	539	151	78	125	TRUE	656	3.25171	9.74138e-216	1.42354e-212	Junb	337.623	348.036	3524.57	3007.42	IPSI_sham	Upregulated
7816	chr8	127319159	127321693	93	52	703	ENSMUSG00000120101	2271	1706	1295	1283	1057	953	TRUE	1251	2.54205	8.20321e-06	0.000108649		10.5179	8.95269	53.869	59.6277	IPSI_sham	Upregulated
8056	chr9	44515377	44516724	79	129	62	ENSMUSG00000120036	4057	2675	1305	1512	1598	1245	TRUE	1246	1.09406	0.00413178	0.0259509		43.1232	36.9299	91.3848	79.7835	IPSI_sham	Upregulated
8083	chr9	47441030	47443172	123	88	315	ENSMUSG00000119966	1629	1117	761	1395	1125	1132	TRUE	1242	2.11317	0.00895809	0.0491595		9.46608	4.47635	34.63	26.0346	IPSI_sham	Upregulated
8387	chr9	92424047	92424820	91	17	52	ENSMUSG00000032374	610	457	288	826	1036	1011	TRUE	387	1.20209	2.38862e-28	2.25805e-26	Plod2	552.188	538.281	1177.42	1330.29	IPSI_sham	Upregulated
8446	chr9	102594797	102596149	88	37	151	ENSMUSG00000032531	2428	1479	875	1100	1152	863	TRUE	392	1.99377	1.59287e-100	9.6319e-98	Amotl2	671.04	724.049	2935.86	2620.26	IPSI_sham	Upregulated
8474	chr9	106341938	106342933	72	69	96	ENSMUSG00000091735	933	498	380	263	251	376	TRUE	882	1.23885	0.00364927	0.0234409	Gpr62	29.45	42.5253	101.004	68.8658	IPSI_sham	Upregulated
8475	chr9	106354262	106354663	57	31	395	ENSMUSG00000023249	439	301	160	1396	976	700	TRUE	180	1.29391	2.6673e-05	0.000322023	Parp3	62.0554	55.9543	135.634	153.688	IPSI_sham	Upregulated
8542	chr9	108702991	108705201	31	49	60	ENSMUSG00000103785	962	613	152	711	808	783	TRUE	980	1.78284	0.00181591	0.0131206		22.0875	11.1909	58.6787	56.2684	IPSI_sham	Upregulated
8623	chr9	119812044	119813150	209	73	93	ENSMUSG00000111639	546	382	310	959	856	620	TRUE	1101	2.74892	0.000203239	0.00197233		7.3625	5.59543	46.1734	41.1515	IPSI_sham	Upregulated
8722	chrX	11953222	11958299	61	119	65	ENSMUSG00000121006	1671	642	668	750	622	490	TRUE	1276	1.93046	8.20117e-05	0.000879338		17.8804	24.6199	60.6026	100.779	IPSI_sham	Upregulated
9125	chrX	168779951	168781330	167	125	209	ENSMUSG00000086695	2930	1943	1324	969	717	665	TRUE	840	2.26508	0.000423526	0.00376525		8.41429	6.71452	38.4778	34.4329	IPSI_sham	Upregulated
9197	chr10	18890847	18891345	27	28	78	ENSMUSG00000019850	1030	471	304	1272	1234	1022	TRUE	92	2.02451	2.85134e-46	5.98815e-44	Tnfaip3	215.616	251.795	961.946	938.086	IPSI_sham	Upregulated
9247	chr10	30718337	30719233	87	60	141	ENSMUSG00000019789	421	188	190	721	646	476	TRUE	90	1.00389	5.69227e-07	9.21696e-06	Hey2	166.182	147.719	302.051	327.532	IPSI_sham	Upregulated
9286	chr10	42150728	42154549	259	129	424	ENSMUSG00000120659	1635	1469	767	1169	1778	1161	TRUE	1266	2.51113	0.00625653	0.0367123		4.20714	4.47635	33.6681	15.9567	IPSI_sham	Upregulated
9483	chr10	77904948	77905674	48	46	52	ENSMUSG00000000732	230	135	105	422	641	342	TRUE	8	1.31883	5.63251e-07	9.12863e-06	Icosl	82.0393	83.9315	188.541	225.074	IPSI_sham	Upregulated
9730	chr10	90664780	90665764	81	96	85	ENSMUSG00000112015	780	530	343	615	599	554	TRUE	444	-1.23831	3.02215e-15	1.22394e-13		404.938	428.61	164.493	188.121	IPSI_sham	Downregulated
9762	chr10	96452347	96453646	56	76	272	ENSMUSG00000036478	3125	1389	750	1959	1497	1372	TRUE	456	1.12319	1.36843e-58	3.87045e-56	Btg1	1741.76	1893.49	3798.72	4115.15	IPSI_sham	Upregulated
9778	chr10	108167699	108169256	0	114	65	ENSMUSG00000035873	132	135	91	937	602	710	TRUE	449	1.14804	1.16318e-05	0.000150037	Pawr	112.541	79.4552	238.562	188.121	IPSI_sham	Upregulated
9780	chr10	110580784	110581634	0	87	180	ENSMUSG00000020185	775	352	210	849	620	643	TRUE	102	1.23149	1.07479e-06	1.66057e-05	E2f7	83.0911	124.219	256.839	229.273	IPSI_sham	Upregulated
9848	chr10	125801955	125802790	37	51	87	ENSMUSG00000020105	374	193	105	648	398	489	TRUE	98	1.12188	4.40104e-06	6.14219e-05	Lrig3	88.35	111.909	204.894	230.113	IPSI_sham	Upregulated
10067	chr11	23720521	23721541	75	64	110	ENSMUSG00000020275	1152	759	470	1160	948	845	TRUE	104	1.54749	1.62284e-29	1.64024e-27	Rel	346.038	321.178	905.191	1044.74	IPSI_sham	Upregulated
10233	chr11	53991622	53992198	0	49	66	ENSMUSG00000018906	344	204	196	678	474	452	TRUE	86	1.1277	3.25826e-12	9.94971e-11	P4ha2	235.6	303.273	607.95	568.563	IPSI_sham	Upregulated
10368	chr11	66058919	66059332	48	27	138	ENSMUSG00000084967	1105	456	252	741	469	383	TRUE	83	-1.23786	1.56896e-20	9.23264e-19	Gm12296	674.195	617.736	284.736	263.706	IPSI_sham	Downregulated
10632	chr11	83958934	83959247	45	49	40	ENSMUSG00000018648	564	508	207	553	672	565	TRUE	83	1.05968	3.51465e-07	5.91486e-06	Dusp14	151.457	180.173	316.48	373.723	IPSI_sham	Upregulated
10719	chr11	94101070	94102919	385	105	703	ENSMUSG00000037573	5901	4285	2425	1680	1647	1801	TRUE	477	1.14891	1.14543e-38	1.76196e-36	Tob1	835.118	804.623	1861.36	1776.23	IPSI_sham	Upregulated
10949	chr11	102298084	102298682	224	108	352	ENSMUSG00000120765	1219	673	405	884	736	745	TRUE	1270	2.67845	0.00522918	0.0315985		5.25893	2.23817	23.0867	25.1948	IPSI_sham	Upregulated
10954	chr11	102357917	102358220	137	27	255	ENSMUSG00000034664	333	169	37	152	210	80	TRUE	420	1.10821	0.000644269	0.00541087	Itga2b	62.0554	51.478	124.091	120.935	IPSI_sham	Upregulated
10978	chr11	103157861	103158676	95	41	372	ENSMUSG00000078635	1183	674	529	441	697	561	TRUE	788	1.94364	0.00278254	0.0187239		8.41429	14.5481	60.6026	27.7143	IPSI_sham	Upregulated
11280	chr12	8548974	8550446	76	46	395	ENSMUSG00000120673	3856	3089	1389	1164	1125	823	TRUE	1267	1.93914	0.000760913	0.00623231		9.46608	17.9054	56.7548	47.8701	IPSI_sham	Upregulated
11284	chr12	8820987	8822941	18	52	84	ENSMUSG00000020592	161	173	175	526	813	409	TRUE	111	1.10397	4.24052e-05	0.000486661	Sdc1	108.334	92.8842	228.943	204.078	IPSI_sham	Upregulated
11316	chr12	17594575	17595429	64	40	204	ENSMUSG00000064427	1358	995	350	871	1261	1083	TRUE	718	2.19219	0.00150688	0.0112285	Gm22748	8.41429	8.95269	35.592	43.671	IPSI_sham	Upregulated
11461	chr12	55538659	55539451	193	115	262	ENSMUSG00000021025	3158	2556	1351	1582	1280	1278	TRUE	121	1.44954	8.53101e-41	1.43158e-38	Nfkbia	509.064	485.684	1331.33	1385.71	IPSI_sham	Upregulated
11523	chr12	70872243	70872805	120	35	220	ENSMUSG00000048285	1766	1117	618	711	662	620	TRUE	620	1.01411	1.37741e-19	7.51299e-18	Frmd6	492.236	515.899	993.69	1041.39	IPSI_sham	Upregulated
12139	chr13	53132398	53132845	51	31	30	ENSMUSG00000056749	1105	808	694	880	747	383	TRUE	686	1.69688	1.53256e-37	2.24895e-35	Nfil3	300.811	278.653	977.337	902.814	IPSI_sham	Upregulated
12175	chr13	55477727	55478145	36	23	17	ENSMUSG00000021485	336	94	66	512	284	306	TRUE	137	1.07612	0.000422335	0.00375752	Mxd3	58.9	61.5498	127.939	125.974	IPSI_sham	Upregulated
12233	chr13	64300218	64301368	32	55	159	ENSMUSG00000114165	422	174	129	1138	1578	880	TRUE	1126	3.90581	5.64545e-05	0.000627169		5.25893	0	51.9451	28.5541	IPSI_sham	Upregulated
12310	chr13	81033548	81034530	157	37	245	ENSMUSG00000089827	3633	3097	1856	1209	1237	906	TRUE	863	2.72591	1.91372e-27	1.72984e-25		45.2268	59.3116	341.491	348.528	IPSI_sham	Upregulated
12580	chr14	20979035	20979853	119	63	308	ENSMUSG00000021823	1365	669	321	1621	1049	797	TRUE	144	1.14111	2.71106e-49	6.13435e-47	Vcl	1268.45	1135.87	2746.35	2560.63	IPSI_sham	Upregulated
12744	chr14	54813145	54815107	0	50	49	ENSMUSG00000022178	466	426	407	495	368	204	TRUE	153	1.52303	5.53404e-13	1.82415e-11	Ajuba	134.629	111.909	346.3	362.805	IPSI_sham	Upregulated
12849	chr14	64181002	64181755	63	49	35	ENSMUSG00000063060	172	160	58	353	91	114	TRUE	711	1.33509	1.52439e-14	5.79234e-13	Sox7	214.564	243.961	580.053	576.121	IPSI_sham	Upregulated
13006	chr14	119174962	119175954	146	69	624	ENSMUSG00000119970	1836	1151	781	1615	1813	1207	TRUE	1243	3.67184	0.000327144	0.0030075		2.10357	2.23817	32.7061	22.6753	IPSI_sham	Upregulated
13234	chr15	74543788	74544652	107	52	130	ENSMUSG00000022602	980	286	190	334	578	349	TRUE	163	2.79292	4.22868e-100	2.4718e-97	Arc	210.357	185.768	1384.24	1363.88	IPSI_sham	Upregulated
13246	chr15	75617901	75620275	154	59	413	ENSMUSG00000047591	0	0	0	66	157	0	TRUE	614	1.67811	0.00520686	0.0314799	Mafa	12.6214	16.7863	60.6026	33.5931	IPSI_sham	Upregulated
13359	chr15	79231510	79232222	66	27	93	ENSMUSG00000042622	239	313	179	550	790	825	TRUE	552	4.42568	4.82374e-106	3.19204e-103	Maff	57.8482	41.4062	1074.49	1066.58	IPSI_sham	Upregulated
13360	chr15	79241514	79242016	0	50	102	ENSMUSG00000121075	102	92	40	114	134	97	TRUE	1281	3.50014	2.68579e-05	0.000324143		2.10357	5.59543	52.907	33.5931	IPSI_sham	Upregulated
13366	chr15	79400479	79400959	0	61	46	ENSMUSG00000010830	0	0	0	57	303	141	TRUE	62	1.15185	0.000507494	0.00440892	Kdelr3	67.3143	42.5253	104.852	139.411	IPSI_sham	Upregulated
13441	chr15	83033052	83033632	0	40	113	ENSMUSG00000065176	2372	1345	903	1286	1392	845	TRUE	723	1.14508	1.57586e-05	0.000198451	Rnu12	72.5732	77.217	159.683	171.325	IPSI_sham	Upregulated
13655	chr15	101151859	101152349	33	61	56	ENSMUSG00000023034	601	415	243	741	568	643	TRUE	175	3.59715	0	0	Nr4a1	376.539	320.059	4272	4170.58	IPSI_sham	Upregulated
13777	chr16	10602079	10604055	126	42	42	ENSMUSG00000038037	1364	901	661	937	970	569	TRUE	487	1.4361	3.39999e-05	0.000400924	Socs1	55.7447	51.478	157.759	132.693	IPSI_sham	Upregulated
13781	chr16	10883839	10884941	260	30	429	ENSMUSG00000022500	2547	1879	1307	1452	1078	1229	TRUE	160	1.31087	3.41531e-20	1.93822e-18	Litaf	295.552	352.512	859.979	747.446	IPSI_sham	Upregulated
13938	chr16	29882097	29883395	68	69	69	ENSMUSG00000022528	1574	978	680	480	620	281	TRUE	162	2.00655	5.74387e-29	5.67462e-27	Hes1	185.114	134.29	611.797	673.541	IPSI_sham	Upregulated
13940	chr16	29888910	29889205	52	76	57	ENSMUSG00000022528	496	217	98	227	225	204	TRUE	162	2.00655	5.74387e-29	5.67462e-27	Hes1	185.114	134.29	611.797	673.541	IPSI_sham	Upregulated
14099	chr16	78172836	78173987	220	84	191	ENSMUSG00000022863	772	420	367	566	934	918	TRUE	168	1.3121	3.74533e-22	2.43252e-20	Btg3	347.089	331.25	778.214	905.333	IPSI_sham	Upregulated
14115	chr16	87495607	87496446	242	52	362	ENSMUSG00000025612	1270	809	486	1271	1333	1199	TRUE	233	1.05448	7.99571e-46	1.64956e-43	Bach1	1393.62	1264.57	2748.28	2774.79	IPSI_sham	Upregulated
14160	chr16	93680378	93681305	125	35	120	ENSMUSG00000022945	0	39	72	623	599	317	TRUE	172	1.23678	0.000109644	0.00113905	Chaf1b	44.175	54.8353	115.433	117.576	IPSI_sham	Upregulated
14303	chr17	23918408	23919292	86	36	239	ENSMUSG00000118572	311	241	210	594	412	532	TRUE	1172	5.41712	0.00828518	0.0462336		0	0	8.65751	8.39827	IPSI_sham	Upregulated
14477	chr17	29709414	29711179	261	49	555	ENSMUSG00000024014	1848	1216	419	1160	642	671	TRUE	190	2.04343	3.26272e-30	3.3855e-28	Pim1	167.234	128.695	637.77	584.519	IPSI_sham	Upregulated
14502	chr17	32073857	32075073	240	125	381	ENSMUSG00000024042	1455	1493	1091	932	1309	1400	TRUE	191	1.66206	2.30704e-99	1.32644e-96	Sik1	871.931	861.697	2755.01	2731.96	IPSI_sham	Upregulated
14738	chr17	52119656	52120677	93	86	98	ENSMUSG00000103216	933	541	310	959	1215	1037	TRUE	203	-1.00963	0.000365385	0.00331131		145.146	117.504	71.184	59.6277	IPSI_sham	Downregulated
14791	chr17	57137876	57138414	82	61	545	ENSMUSG00000024206	291	105	134	904	538	286	TRUE	196	1.0569	9.91485e-09	2.06984e-07	Rfx2	216.668	188.007	448.267	394.719	IPSI_sham	Upregulated
14966	chr18	3507135	3508532	245	52	229	ENSMUSG00000024232	697	589	129	610	799	977	TRUE	199	1.23284	3.4732e-06	4.95186e-05	Bambi	158.82	85.0506	299.165	275.463	IPSI_sham	Upregulated
15084	chr18	34992880	34993106	0	41	178	ENSMUSG00000038418	1160	696	434	893	829	129	TRUE	491	4.48198	0	0	Egr1	973.954	955.7	21845.8	21285.4	IPSI_sham	Upregulated
15085	chr18	34993528	34994275	111	96	118	ENSMUSG00000038418	1160	696	347	893	829	783	TRUE	491	4.48198	0	0	Egr1	973.954	955.7	21845.8	21285.4	IPSI_sham	Upregulated
15086	chr18	35020222	35020838	91	55	191	ENSMUSG00000038418	627	387	327	394	538	446	TRUE	491	4.48198	0	0	Egr1	973.954	955.7	21845.8	21285.4	IPSI_sham	Upregulated
15116	chr18	36648258	36649127	101	51	153	ENSMUSG00000024486	416	247	70	515	397	507	TRUE	205	1.39619	6.70095e-29	6.58307e-27	Hbegf	357.607	408.467	991.766	1022.91	IPSI_sham	Upregulated
15290	chr18	64793563	64794581	0	55	45	ENSMUSG00000039529	509	277	77	526	553	382	TRUE	516	1.16665	4.27617e-05	0.000490431	Atp8b1	64.159	72.7406	165.455	141.931	IPSI_sham	Upregulated
15386	chr18	80750807	80751878	59	113	43	ENSMUSG00000118265	721	358	325	711	457	241	TRUE	1166	3.55847	0.000904986	0.00724673		3.15536	1.11909	23.0867	27.7143	IPSI_sham	Upregulated
15715	chr19	36325527	36326941	55	99	29	ENSMUSG00000024805	348	324	118	849	992	862	TRUE	214	1.18293	7.13169e-19	3.72206e-17	Pcgf5	327.105	337.964	758.975	750.805	IPSI_sham	Upregulated
15854	chr19	46292894	46294259	0	36	133	ENSMUSG00000118087	468	284	279	841	415	458	TRUE	1161	1.62244	0.00170465	0.0124514	4833438C02Rik	15.7768	22.3817	64.4504	52.9091	IPSI_sham	Upregulated
15897	chr19	53517133	53518140	0	86	110	ENSMUSG00000118210	237	186	246	495	477	242	TRUE	1164	5.3456	0.00205609	0.0145252		0	1.11909	17.315	26.8745	IPSI_sham	Upregulated
15911	chr19	56710078	56712429	73	117	72	ENSMUSG00000035283	871	792	499	720	517	446	TRUE	435	1.07324	1.2397e-14	4.75178e-13	Adrb1	306.07	324.535	657.009	669.342	IPSI_sham	Upregulated
